# Supplementary material for: The Major Peanut Allergen Ara h 2 Produced in Nicotiana benthamiana Contains Hydroxyprolines and Is a Viable Alternative to the E. Coli Product in Allergy Diagnosis
Source: Front Plant Sci. 2021 Oct 4;12:723363. doi: 10.3389/fpls.2021.723363 (PMC8522509; doi:10.3389/fpls.2021.723363)
Supplement: Supplementary file 6 [file Data_Sheet_1.XLSX]

## Sheet: rAra-h2 coverage
	Sequence coverage 89%
	1 MRQQWELQGD RRCQSQLERA NLRPCEQHLM QKIQRDEDSY GRDPYSPSQD
	51 PYSPSQDPDR RDPYSPSPYD RRGAGSSQHQ ERCCNELNEF ENNQRCMCEA
	101 LQQIMEQQSD RLQGRQQEQQ FKRELRNLPQ QCGLRAPQRC DLEVESGGRD
	151 RYHHHHHHSE KDEL
		Hydroxy-prolines as identified with MaxQuant are underlined
		in color the hydroxylation is not present in natural Ara h 2.0201 isoform

## Sheet: proteingroups
Majority protein IDs	Protein names	Gene names	Fasta headers	Number of proteins	Peptides	Razor + unique peptides	Unique peptides	Sequence coverage [%]	Mol. weight [kDa]	Q-value	Score	Potential contaminant	Only identified by site	Intensity	MS/MS count	Protein IDs	Peptide counts (all)	Peptide counts (razor+unique)	Peptide counts (unique)	Unique + razor sequence coverage [%]	Unique sequence coverage [%]	Sequence length	Sequence lengths	id	Taxonomy IDs	Peptide IDs	Peptide is razor	Mod. peptide IDs	Evidence IDs	MS/MS IDs	Best MS/MS	Oxidation (M) site IDs	Oxidation (P) site IDs	Oxidation (M) site positions	Oxidation (P) site positions
P00761	Trypsin	NA	sp|P00761|TRYP_PIG Trypsin OS=Sus scrofa PE=1 SV=1	1	7	7	7	43.3	24.409	0	164.07	+		34.5517	185	CON__sp|P00761|TRYP_PIG	7	7	7	43.3	43.3	231	231	0	NA	13;80;118;130;185;214;242	True;True;True;True;True;True;True	16;99;100;144;157;232;261;293	29;161;162;163;225;226;242;243;244;245;246;247;248;249;250;251;252;253;254;255;256;257;258;259;260;261;262;263;264;265;411;448;487;488;489;490	70;372;373;374;375;376;483;484;485;486;487;488;489;515;516;517;518;519;520;521;522;523;524;525;526;527;528;529;530;531;532;533;534;535;536;537;538;539;540;541;542;543;544;545;546;547;548;549;550;551;5	70;375;484;518;810;877;953	0		94
rAra_h2	rAra_h2			1	30	30	30	89.6	19.663	0	323.31			34.2716	179	rAra_h2	30	30	30	89.6	89.6	164	164	38	NA	10;11;18;19;20;21;25;26;27;28;29;30;31;87;88;89;136;137;147;148;153;160;161;162;163;164;173;174;175;178	True;True;True;True;True;True;True;True;True;True;True;True;True;True;True;True;True;True;True;True;True;True;True;True;True;True;True;True;True;True	10;11;12;13;14;21;22;23;24;25;26;30;31;32;33;34;35;36;37;38;39;40;41;42;43;44;45;46;108;109;110;111;112;113;163;164;177;178;186;187;197;198;199;200;201;202;203;204;218;219;220;221;222;225	11;12;13;14;15;16;17;18;19;20;21;22;23;24;25;26;27;34;35;36;37;38;39;40;41;42;43;44;45;46;47;48;49;50;51;52;53;54;55;56;57;58;59;60;61;62;66;67;68;69;70;71;72;73;74;75;76;77;78;79;80;81;82;83;84;85;86	21;22;23;24;25;26;27;28;29;30;31;32;33;34;35;36;37;38;39;40;41;42;43;44;45;46;47;48;49;50;51;52;53;54;55;56;57;58;59;60;61;62;63;64;65;66;67;68;78;79;80;81;82;83;84;85;86;87;88;89;90;91;92;93;94;95;96	58;68;81;109;113;165;183;185;218;242;272;277;283;393;395;407;576;581;645;687;718;734;742;746;750;751;782;783;790;800	33;34;35;36	13;14;15;16;17;18;19	1;30;97;105	24;44;47;51;54;66;68
P13645	Keratin, type I cytoskeletal 10	KRT10	sp|P13645|K1C10_HUMAN Keratin, type I cytoskeletal 10 OS=Homo sapiens GN=KRT10 PE=1 SV=6	23	25	25	21	42.6	58.826	0	323.31	+		32.4568	113	CON__sp|P13645|K1C10_HUMAN;CON__sp|P02535|K1C10_MOUSE;CON__sp|P08730|K1C13_MOUSE;CON__sp|O77727|K1C15_SHEEP;CON__sp|P13646|K1C13_HUMAN;CON__sp|Q7Z3Y7|K1C28_HUMAN;CON__sp|P05784|K1C18_MOUSE;CON__sp|Q148H6|K1C28_BOVIN;CON__sp|Q99456|K1C12_HUMAN;CON__sp|Q2M2I5|K1C24_HUMAN;CON__sp|Q61897|KT33B_MOUSE;CON__sp|Q14525|KT33B_HUMAN;CON__sp|P02534|K1M1_SHEEP;CON__sp|Q61765|K1H1_MOUSE;CON__sp|Q15323|K1H1_HUM…	25;8;5;5;3;3;2;2;2;2;1;1;1;1;1;1;1;1;1;1;1;1;1	25;8;5;5;3;3;2;2;2;2;1;1;1;1;1;1;1;1;1;1;1;1;1	21;6;2;4;2;1;0;0;0;1;0;0;0;0;0;0;0;0;0;0;0;0;0	42.6	38.4	584	584;570;437;453;458;464;423;464;494;525;404;404;412;416;416;448;449;450;455;455;456;467;468	11	NA	4;7;41;67;81;90;94;101;105;112;113;121;140;152;165;168;169;184;190;195;203;212;213;249;254	True;True;True;True;True;True;True;True;True;True;True;True;True;True;True;True;True;True;True;True;True;True;True;True;True	4;7;59;86;101;114;118;126;127;131;138;139;147;168;169;185;205;209;210;211;212;231;237;242;250;259;260;300;305;306	4;5;8;114;115;146;147;164;186;187;191;202;203;204;205;209;210;218;219;229;230;278;279;280;281;282;283;357;378;379;380;384;385;386;387;410;417;423;433;444;445;446;447;497;502;503;504;505	5;6;7;8;9;12;13;14;15;16;17;314;315;355;356;377;421;422;423;424;425;426;427;431;432;446;447;448;449;450;451;457;458;459;460;461;462;473;474;475;476;477;493;494;495;496;497;498;499;500;589;590;591;592;	5;13;314;355;377;421;432;449;458;473;476;500;604;715;756;766;770;809;816;828;846;862;873;1073;1084	4;14;15;16		150;291;306;321
P04264	Keratin, type II cytoskeletal 1	KRT1	sp|P04264|K2C1_HUMAN Keratin, type II cytoskeletal 1 OS=Homo sapiens GN=KRT1 PE=1 SV=6	1	38	38	25	43.8	66.038	0	323.31	+		31.4585	109	CON__sp|P04264|K2C1_HUMAN	38	38	25	43.8	33.5	644	644	8	NA	2;3;33;35;52;95;107;115;123;128;138;142;143;144;145;150;158;179;180;182;183;187;188;194;198;199;200;206;207;208;225;226;229;232;233;255;258;259	True;True;True;True;True;True;True;True;True;True;True;True;True;True;True;True;True;True;True;True;True;True;True;True;True;True;True;True;True;True;True;True;True;True;True;True;True;True	2;3;48;51;52;71;119;120;133;141;149;150;155;165;172;173;174;175;181;182;183;194;195;226;227;229;230;234;235;241;245;246;247;253;254;255;273;274;277;281;282;307;310;311	2;3;100;101;105;106;127;192;193;194;212;213;221;222;232;233;234;240;275;286;287;288;289;290;291;347;348;349;350;351;352;353;354;367;368;404;405;408;409;413;414;415;422;427;428;429;437;438;439;440;462;	2;3;4;289;290;291;292;298;299;300;301;302;303;332;433;434;435;436;437;465;466;467;479;480;502;503;504;511;512;513;583;610;611;612;613;614;615;616;617;618;619;690;691;692;693;694;695;696;697;698;699;70	2;4;289;303;332;433;466;480;503;512;583;610;611;612;615;699;730;802;803;806;807;813;814;825;834;836;840;852;855;858;905;906;915;923;927;1087;1092;1093	9;10;11;12;13		259;262;296;469;493
P35908	Keratin, type II cytoskeletal 2 epidermal	KRT2	sp|P35908|K22E_HUMAN Keratin, type II cytoskeletal 2 epidermal OS=Homo sapiens GN=KRT2 PE=1 SV=2	3	34	33	19	45.7	65.432	0	323.31	+		30.8321	84	CON__sp|P35908|K22E_HUMAN;CON__sp|Q01546|K22O_HUMAN;CON__sp|P19013|K2C4_HUMAN	34;11;2	33;10;2	19;0;0	45.7	31.9	639	639;638;534	18	NA	15;34;36;39;46;47;54;55;57;59;68;72;96;99;100;104;108;109;122;124;126;146;151;181;186;202;218;221;222;236;245;258;260;261	True;True;True;True;True;True;True;True;True;True;True;True;True;True;True;True;True;True;True;True;True;True;True;True;True;True;True;True;True;True;True;False;True;True	18;49;50;53;54;57;64;65;73;74;76;78;87;91;121;124;125;130;134;135;148;151;153;176;184;228;233;249;266;269;270;285;286;296;310;312;313	31;102;103;104;107;108;111;112;120;121;129;130;131;133;135;148;152;195;198;199;200;201;208;214;215;231;235;237;292;355;356;406;407;412;432;453;456;457;458;477;478;479;493;510;512;513;514	72;73;74;75;293;294;295;296;297;304;305;306;307;311;312;320;321;322;323;324;325;334;335;336;337;338;340;342;343;357;361;362;438;441;442;443;444;445;454;455;456;468;469;470;501;505;506;508;620;711;712;	73;294;305;311;321;324;334;337;340;342;357;361;438;441;443;454;468;470;501;506;508;620;711;804;811;843;886;893;901;939;1066;1092;1094;1099	27;28;29		257;294;467
P35527	Keratin, type I cytoskeletal 9	KRT9	sp|P35527|K1C9_HUMAN Keratin, type I cytoskeletal 9 OS=Homo sapiens GN=KRT9 PE=1 SV=3	1	18	17	17	35.3	62.064	0	186.36	+		28.4236	36	CON__sp|P35527|K1C9_HUMAN	18	17	17	34.2	34.2	623	623	17	NA	38;48;56;58;73;82;85;86;112;139;155;156;157;172;217;228;230;251	True;True;True;True;True;True;True;True;False;True;True;True;True;True;True;True;True;True	56;66;67;75;77;92;102;103;106;107;138;166;167;189;190;191;192;193;215;216;217;264;265;276;278;279;302	110;122;123;132;134;153;165;166;167;168;169;173;174;218;276;277;362;363;364;365;366;390;391;392;451;452;466;468;469;499	309;310;326;327;339;341;363;378;379;380;381;382;383;384;385;386;390;391;473;474;584;585;586;587;588;720;721;722;723;724;725;726;727;776;777;778;779;780;781;881;882;883;884;885;909;910;911;912;913;918;	309;326;339;341;363;379;390;391;473;584;720;724;727;780;882;909;918;1078	22;23;24;25;26		157;234;245;269;326
P13647	Keratin, type II cytoskeletal 5	KRT5	sp|P13647|K2C5_HUMAN Keratin, type II cytoskeletal 5 OS=Homo sapiens GN=KRT5 PE=1 SV=3	9	28	18	5	38	62.378	0	126.33	+		27.4799	27	CON__sp|P13647|K2C5_HUMAN;CON__sp|O95678|K2C75_HUMAN;CON__sp|P07744|K2C4_MOUSE;CON__sp|Q8VED5|K2C79_MOUSE;CON__sp|Q6NXH9|K2C73_MOUSE;CON__sp|Q9DCV7|K2C7_MOUSE;CON__sp|P08729|K2C7_HUMAN;CON__sp|Q9R0H5|K2C71_MOUSE;CON__sp|Q9NSB2|KRT84_HUMAN	28;9;6;6;4;2;2;2;2	18;1;0;0;0;0;0;0;0	5;0;0;0;0;0;0;0;0	29.3	9.3	590	590;551;525;531;539;457;469;524;600	12	NA	14;32;45;46;47;64;71;92;100;106;108;109;122;127;144;145;146;149;159;193;210;235;237;238;243;253;256;258	True;True;True;False;False;True;True;True;False;True;False;False;False;True;False;False;False;True;True;True;True;True;True;True;True;True;True;False	17;47;63;64;65;83;90;116;125;132;134;135;148;154;174;175;176;179;180;196;240;257;284;287;288;289;294;304;308;310	30;99;119;120;121;142;151;189;200;201;211;214;215;231;238;239;288;289;290;291;292;345;346;369;421;442;476;480;481;482;483;491;501;507;510	71;288;319;320;321;322;323;324;325;350;351;360;429;443;444;445;463;464;468;469;470;501;509;510;612;613;614;615;616;617;618;619;620;688;689;731;824;860;936;941;942;943;944;945;1063;1064;1080;1088;1089;	71;288;319;321;324;350;360;429;443;463;468;470;501;509;612;615;620;689;731;824;860;936;943;945;1063;1080;1088;1092	5;17;18;19;20;21		247;274;284;297;303;457
P02533	Keratin, type I cytoskeletal 14	KRT14	sp|P02533|K1C14_HUMAN Keratin, type I cytoskeletal 14 OS=Homo sapiens GN=KRT14 PE=1 SV=4	7	15	11	2	29.7	51.561	0	84.059	+		26.7176	13	CON__sp|P02533|K1C14_HUMAN;CON__sp|Q6IFX2|K1C42_MOUSE;CON__sp|P08727|K1C19_HUMAN;CON__sp|P19001|K1C19_MOUSE;CON__sp|P19012|K1C15_HUMAN;CON__sp|Q9Z2K1|K1C16_MOUSE;CON__tr|Q3ZAW8|Q3ZAW8_MOUSE	15;5;4;4;4;4;4	11;4;1;1;1;2;2	2;1;0;0;0;0;0	24.4	5.3	472	472;452;400;403;456;469;470	2	NA	12;16;17;44;65;83;93;105;112;113;141;189;227;248;254	True;True;True;True;True;True;True;False;False;False;True;True;True;True;False	15;19;20;62;84;104;117;131;138;139;170;171;236;275;299;305;306	28;32;33;118;143;170;190;209;210;218;219;284;285;416;464;465;496;502;503;504;505	69;76;77;318;352;387;430;457;458;459;460;461;462;473;474;475;476;477;608;609;815;907;908;1069;1070;1081;1082;1083;1084;1085;1086	69;76;77;318;352;387;430;458;473;476;608;815;908;1069;1084	2;3;4		119;257;287
Q7Z794	Keratin, type II cytoskeletal 1b	KRT77	sp|Q7Z794|K2C1B_HUMAN Keratin, type II cytoskeletal 1b OS=Homo sapiens GN=KRT77 PE=2 SV=3	1	12	9	7	18.2	61.901	0	75.293	+		25.4184	12	CON__sp|Q7Z794|K2C1B_HUMAN	12	9	7	16.6	12.8	578	578	24	NA	43;46;47;125;171;201;204;211;224;246;258;263	True;False;False;True;True;True;True;True;True;True;False;True	61;64;65;152;214;248;251;258;272;297;310;315	117;120;121;236;389;430;431;434;435;443;460;461;494;510;516	317;320;321;322;323;324;325;507;775;841;842;847;848;861;903;904;1067;1092;1103	317;321;324;507;775;841;848;861;904;1067;1092;1103	30		169
P02769	Serum albumin	ALB	sp|P02769|ALBU_BOVIN Serum albumin OS=Bos taurus GN=ALB PE=1 SV=4	1	12	12	8	23.7	69.293	0	100.3	+		25.8109	11	CON__sp|P02769|ALBU_BOVIN	12	12	8	23.7	18.9	607	607	7	NA	22;60;103;117;119;132;134;135;177;239;250;262	True;True;True;True;True;True;True;True;True;True;True;True	27;79;129;143;145;159;161;162;224;290;301;314	63;136;207;224;227;267;269;270;402;484;498;515	174;344;453;482;490;491;571;573;574;575;799;946;947;1076;1101;1102	174;344;453;482;490;571;573;575;799;947;1076;1101	7;8	0;1;2	469;571	59;470;540
Q5D862	Filaggrin-2	FLG2	sp|Q5D862|FILA2_HUMAN Filaggrin-2 OS=Homo sapiens GN=FLG2 PE=1 SV=1	1	6	6	6	4.7	248.07	0	58.311	+		25.1386	10	CON__sp|Q5D862|FILA2_HUMAN	6	6	6	4.7	4.7	2391	2391	21	NA	40;51;74;154;197;220	True;True;True;True;True;True	58;70;93;188;244;268	113;126;154;361;425;426;455	313;330;331;364;719;830;831;832;890;891	313;330;364;719;830;890
P20930	Filaggrin	FLG	sp|P20930|FILA_HUMAN Filaggrin OS=Homo sapiens GN=FLG PE=1 SV=3	1	10	10	10	5.4	435.16	0	61.222	+		23.8973	9	CON__sp|P20930|FILA_HUMAN	10	10	10	5.4	5.4	4061	4061	14	NA	42;70;75;76;77;97;98;102;110;111	True;True;True;True;True;True;True;True;True;True	60;89;94;95;96;122;123;128;136;137	116;150;155;156;157;158;196;197;206;216;217	316;359;365;366;367;368;439;440;452;471;472	316;359;365;366;368;439;440;452;471;472
Q86YZ3	Hornerin	HRNR	sp|Q86YZ3|HORN_HUMAN Hornerin OS=Homo sapiens GN=HRNR PE=1 SV=2	1	6	6	6	7.3	282.39	0	69.222	+		24.8446	9	CON__sp|Q86YZ3|HORN_HUMAN	6	6	6	7.3	7.3	2850	2850	25	NA	62;63;66;166;167;191	True;True;True;True;True;True	81;82;85;206;207;208;238	138;139;140;141;144;145;381;382;383;418;419	346;347;348;349;353;354;762;763;764;821;822	346;348;353;763;764;822
P02768	Serum albumin	ALB	sp|P02768|ALBU_HUMAN Serum albumin OS=Homo sapiens GN=ALB PE=1 SV=2	1	10	6	6	14	69.366	0	40.627	+		24.163	6	CON__sp|P02768|ALBU_HUMAN	10	6	6	9.2	9.2	609	609	6	NA	24;50;103;114;133;134;170;176;250;262	True;True;False;True;True;False;True;True;False;False	29;69;129;140;160;161;213;223;301;314	65;125;207;220;268;269;388;401;498;515	176;329;453;478;572;573;774;798;1076;1101;1102	176;329;453;478;572;573;774;798;1076;1101
P22629	Streptavidin	NA	sp|P22629|SAV_STRAV Streptavidin OS=Streptomyces avidinii PE=1 SV=1	1	2	2	2	21.3	18.834	0	33.225	+		23.3623	4	CON__sp|P22629|SAV_STRAV	2	2	2	21.3	21.3	183	183	15	NA	84;257	True;True	105;309	171;172;508;509	388;389;1090;1091	388;1090
P02754	Beta-lactoglobulin	LGB	sp|P02754|LACB_BOVIN Beta-lactoglobulin OS=Bos taurus GN=LGB PE=1 SV=3	1	2	2	2	10.1	19.883	0	14.519	+		22.0992	3	CON__sp|P02754|LACB_BOVIN	2	2	2	10.1	10.1	178	178	5	NA	9;234	True;True	9;283	10;475	19;20;935	19;935	6		161
P15252	Rubber elongation factor protein	NA	sp|P15252|REF_HEVBR Rubber elongation factor protein OS=Hevea brasiliensis PE=1 SV=2	1	3	3	3	27.5	14.722	0	20.602	+		23.3269	3	CON__sp|P15252|REF_HEVBR	3	3	3	27.5	27.5	138	138	13	NA	23;196;205	True;True;True	28;243;252	64;424;436	175;829;849	175;829;849
Q8N1N4	Keratin, type II cytoskeletal 78	KRT78	sp|Q8N1N4|K2C78_HUMAN Keratin, type II cytoskeletal 78 OS=Homo sapiens GN=KRT78 PE=2 SV=2	1	4	3	3	7.7	56.865	0	19.303	+		22.3898	3	CON__sp|Q8N1N4|K2C78_HUMAN	4	3	3	6.2	6.2	520	520	26	NA	78;122;231;244	True;False;True;True	97;148;280;295	159;231;470;492	369;501;920;1065	369;501;920;1065
P00883	Fructose-bisphosphate aldolase A	ALDOA	sp|P00883|ALDOA_RABIT Fructose-bisphosphate aldolase A OS=Oryctolagus cuniculus GN=ALDOA PE=1 SV=2	1	1	1	1	5.5	39.342	0	9.6728	+		21.7742	2	CON__sp|P00883|ALDOA_RABIT	1	1	1	5.5	5.5	364	364	1	NA	79	TRUE	98	160	370;371	370	1		165
P48668	Keratin, type II cytoskeletal 6C	KRT6C	sp|P48668|K2C6C_HUMAN Keratin, type II cytoskeletal 6C OS=Homo sapiens GN=KRT6C PE=1 SV=3	2	17	2	0	21.1	60.024	0	12.721	+		21.5056	2	CON__sp|P48668|K2C6C_HUMAN;CON__sp|P02538|K2C6A_HUMAN	17;17	2;2	0;0	4.1	0	564	564;564	3	NA	1;15;32;46;47;64;100;108;109;122;144;145;146;159;223;256;258	True;False;False;False;False;False;False;False;False;False;False;False;False;False;True;False;False	1;18;47;64;65;83;125;134;135;148;174;175;176;196;271;308;310	1;31;99;120;121;142;200;201;214;215;231;288;289;290;291;292;369;459;507;510	1;72;73;74;75;288;320;321;322;323;324;325;350;351;443;444;445;468;469;470;501;612;613;614;615;616;617;618;619;620;731;902;1088;1089;1092	1;73;288;321;324;350;443;468;470;501;612;615;620;731;902;1088;1092	5		279
P34955	Alpha-1-antiproteinase	SERPINA1	sp|P34955|A1AT_BOVIN Alpha-1-antiproteinase OS=Bos taurus GN=SERPINA1 PE=1 SV=1	1	2	2	2	6	46.103	0	19.832	+		23.6031	2	CON__sp|P34955|A1AT_BOVIN	2	2	2	6	6	416	416	16	NA	129;219	True;True	156;267	241;454	514;889	514;889
Q04695	Keratin, type I cytoskeletal 17	KRT17	sp|Q04695|K1C17_HUMAN Keratin, type I cytoskeletal 17 OS=Homo sapiens GN=KRT17 PE=1 SV=2	2	10	2	2	19.9	48.105	0	14.741	+		22.2939	2	CON__sp|Q04695|K1C17_HUMAN;CON__sp|Q9QWL7|K1C17_MOUSE	10;8	2;1	2;1	4.4	4.4	432	432;433	20	NA	6;37;44;83;105;112;113;141;189;248	True;True;False;False;False;False;False;False;False;False	6;55;62;104;131;138;139;170;171;236;299	7;109;118;170;209;210;218;219;284;285;416;496	11;308;318;387;457;458;459;460;461;462;473;474;475;476;477;608;609;815;1069;1070	11;308;318;387;458;473;476;608;815;1069	2;3		226;256
NbS00056894g0001.1proteinAED:0.20eAED:0.20QI:0|-1|0|1|-1|1|1|0|103;(*SWP)sp|P0CG89|H4_SOYBN(e_value=1e-52)HistoneH4OS=GlycinemaxPE=3SV=1;;(*TAIR)AT5G59970.1(e_value=9e-54)|Symbols:|Histonesuperfamilyprotein|chr5:24146352-24146663RVERSELENGTH=103;;(*ITAG)Solyc11g066160.1.1(e_value=8e-54)evidence_code:10F1H1E1IEGgenomic_reference:SL2.40ch11gene_region:48939641-48939952transcript_region:SL2.40ch11:4…	protein AED:0.20 eAED:0.20 QI:0|-1|0|1|-1|1|1|0|103; (*SWP) sp|P0CG89|H4_SOYBN (e_value=1e-52) Histone H4	NA	NbS00056894g0001.1 protein AED:0.20 eAED:0.20 QI:0|-1|0|1|-1|1|1|0|103; (*SWP) sp|P0CG89|H4_SOYBN (e_value=1e-52) Histone H4 OS=Glycine max PE=3 SV=1;; (*TAIR) AT5G59970.1 (e_value=9e-54) | Symbols: | Histone superfamily protein | chr5:24146352-24146663 R	18	2	2	2	21.4	11.409	0	12.112			21.2518	2	NbS00056894g0001.1proteinAED:0.20eAED:0.20QI:0|-1|0|1|-1|1|1|0|103;(*SWP)sp|P0CG89|H4_SOYBN(e_value=1e-52)HistoneH4OS=GlycinemaxPE=3SV=1;;(*TAIR)AT5G59970.1(e_value=9e-54)|Symbols:|Histonesuperfamilyprotein|chr5:24146352-24146663RVERSELENGTH=103;;(*ITAG)Solyc11g066160.1.1(e_value=8e-54)evidence_code:10F1H1E1IEGgenomic_reference:SL2.40ch11gene_region:48939641-48939952transcript_region:SL2.40ch11:4…	2;2;2;2;2;2;2;2;2;2;2;2;2;2;2;2;1;1	2;2;2;2;2;2;2;2;2;2;2;2;2;2;2;2;1;1	2;2;2;2;2;2;2;2;2;2;2;2;2;2;2;2;1;1	21.4	21.4	103	103;103;103;103;103;103;103;103;103;103;103;103;103;106;202;237;203;217	27	NA	91;240	True;True	115;291	188;485	428;948	428;948	31		85
NbS00002538g0008.1proteinAED:0.19eAED:0.20QI:0|0.66|0|1|0.66|0.5|4|0|335;(*GB)gi|324331817|gb|ADY38689.1|(e_value=0.0)actin[Camelliasinensis];;(*SWP)sp|P30171|ACT11_SOLTU(e_value=0.0)Actin-97OS=SolanumtuberosumGN=AC97PE=3SV=1;;(*TAIR)AT5G09810.1(e_value=0.0)|Symbols:ACT7|actin7|chr5:3052809-3054220FORWARDLENGTH=377;;(*ITAG)Solyc04g011500.2.1(e_value=0.0)genomic_reference:SL2.40ch04gene_region:393…	protein AED:0.19 eAED:0.20 QI:0|0.66|0|1|0.66|0.5|4|0|335; (*GB) gi|324331817|gb|ADY38689.1| (e_value=0.0) actin [Camellia sinensis];; (*SWP) sp|P30171|ACT11_SOLTU (e_value=0.0) Actin-97	AC97	NbS00002538g0008.1 protein AED:0.19 eAED:0.20 QI:0|0.66|0|1|0.66|0.5|4|0|335; (*GB) gi|324331817|gb|ADY38689.1| (e_value=0.0) actin [Camellia sinensis];; (*SWP) sp|P30171|ACT11_SOLTU (e_value=0.0) Actin-97 OS=Solanum tuberosum GN=AC97 PE=3 SV=1;; (*TAIR) A	24	2	2	2	8.4	37.511	0	12.969			22.9258	2	NbS00002538g0008.1proteinAED:0.19eAED:0.20QI:0|0.66|0|1|0.66|0.5|4|0|335;(*GB)gi|324331817|gb|ADY38689.1|(e_value=0.0)actin[Camelliasinensis];;(*SWP)sp|P30171|ACT11_SOLTU(e_value=0.0)Actin-97OS=SolanumtuberosumGN=AC97PE=3SV=1;;(*TAIR)AT5G09810.1(e_value=0.0)|Symbols:ACT7|actin7|chr5:3052809-3054220FORWARDLENGTH=377;;(*ITAG)Solyc04g011500.2.1(e_value=0.0)genomic_reference:SL2.40ch04gene_region:393…	2;2;2;2;2;1;1;1;1;1;1;1;1;1;1;1;1;1;1;1;1;1;1;1	2;2;2;2;2;1;1;1;1;1;1;1;1;1;1;1;1;1;1;1;1;1;1;1	2;2;2;2;2;1;1;1;1;1;1;1;1;1;1;1;1;1;1;1;1;1;1;1	8.4	8.4	335	335;382;416;443;449;278;296;364;366;367;377;377;377;377;377;377;391;400;405;417;421;437;439;455	30	NA	69;241	True;True	88;292	149;486	358;949	358;949
P02663	Alpha-S2-casein	CSN1S2	sp|P02663|CASA2_BOVIN Alpha-S2-casein OS=Bos taurus GN=CSN1S2 PE=1 SV=2	1	1	1	1	5	26.018	0	7.0302	+		20.8125	1	CON__sp|P02663|CASA2_BOVIN	1	1	1	5	5	222	222	4	NA	8	TRUE	8	9	18	18
P05787	Keratin, type II cytoskeletal 8	KRT8	sp|P05787|K2C8_HUMAN Keratin, type II cytoskeletal 8 OS=Homo sapiens GN=KRT8 PE=1 SV=7	1	6	1	1	6.4	53.704	0	8.8094	+		21.3732	1	CON__sp|P05787|K2C8_HUMAN	6	1	1	2.5	2.5	483	483	9	NA	46;47;116;144;145;258	False;False;True;False;False;False	64;65;142;174;175;310	120;121;223;288;289;290;291;510	320;321;322;323;324;325;481;612;613;614;615;616;617;618;619;1092	321;324;481;612;615;1092
P08779	Keratin, type I cytoskeletal 16	KRT16	sp|P08779|K1C16_HUMAN Keratin, type I cytoskeletal 16 OS=Homo sapiens GN=KRT16 PE=1 SV=4	1	10	1	1	17.1	51.267	0	6.5289	+		20.2927	1	CON__sp|P08779|K1C16_HUMAN	10	1	1	1.7	1.7	473	473	10	NA	16;17;65;93;105;112;113;192;248;254	False;False;False;False;False;False;False;True;False;False	19;20;84;117;131;138;139;239;299;305;306	32;33;143;190;209;210;218;219;420;496;502;503;504;505	76;77;352;430;457;458;459;460;461;462;473;474;475;476;477;823;1069;1070;1081;1082;1083;1084;1085;1086	76;77;352;430;458;473;476;823;1069;1084	4		121
P61626	Lysozyme C	LYZ	sp|P61626|LYSC_HUMAN Lysozyme C OS=Homo sapiens GN=LYZ PE=1 SV=1	1	1	1	1	8.1	16.537	0	14.571	+		22.8706	1	CON__sp|P61626|LYSC_HUMAN	1	1	1	8.1	8.1	148	148	19	NA	215	TRUE	262	449	879	879
Q7RTS7	Keratin, type II cytoskeletal 74	KRT74	sp|Q7RTS7|K2C74_HUMAN Keratin, type II cytoskeletal 74 OS=Homo sapiens GN=KRT74 PE=1 SV=2	3	5	1	0	5.7	57.865	0	6.9581	+		23.1282	1	CON__sp|Q7RTS7|K2C74_HUMAN;CON__sp|Q86Y46|K2C73_HUMAN;CON__sp|Q3SY84|K2C71_HUMAN	5;5;3	1;1;1	0;0;0	2.3	0	529	529;540;523	22	NA	46;47;49;100;122	False;False;True;False;False	64;65;68;125;148	120;121;124;200;201;231	320;321;322;323;324;325;328;443;444;445;501	321;324;328;443;501
NbS00026888g0002.1proteinAED:0.13eAED:0.20QI:0|0|0|0.5|1|1|2|0|298;(*SWP)sp|P14641|TBA2_MAIZE(e_value=1e-141)Tubulinalpha-2chainOS=ZeamaysGN=TUBA2PE=3SV=1;;(*TAIR)AT4G14960.1(e_value=6e-142)|Symbols:TUA6|Tubulin/FtsZfamilyprotein|chr4:8548753-8550319RVERSELENGTH=427;;(*ITAG)Solyc08g006890.2.1(e_value=1e-144)genomic_reference:SL2.40ch08gene_region:1457076-1460213transcript_region:SL2.40ch08:145707…	protein AED:0.13 eAED:0.20 QI:0|0|0|0.5|1|1|2|0|298; (*SWP) sp|P14641|TBA2_MAIZE (e_value=1e-141) Tubulin alpha-2 chain	TUBA2	NbS00026888g0002.1 protein AED:0.13 eAED:0.20 QI:0|0|0|0.5|1|1|2|0|298; (*SWP) sp|P14641|TBA2_MAIZE (e_value=1e-141) Tubulin alpha-2 chain OS=Zea mays GN=TUBA2 PE=3 SV=1;; (*TAIR) AT4G14960.1 (e_value=6e-142) | Symbols: TUA6 | Tubulin/FtsZ family protein |	12	1	1	1	4.7	33.371	0	9.291			21.4032	1	NbS00026888g0002.1proteinAED:0.13eAED:0.20QI:0|0|0|0.5|1|1|2|0|298;(*SWP)sp|P14641|TBA2_MAIZE(e_value=1e-141)Tubulinalpha-2chainOS=ZeamaysGN=TUBA2PE=3SV=1;;(*TAIR)AT4G14960.1(e_value=6e-142)|Symbols:TUA6|Tubulin/FtsZfamilyprotein|chr4:8548753-8550319RVERSELENGTH=427;;(*ITAG)Solyc08g006890.2.1(e_value=1e-144)genomic_reference:SL2.40ch08gene_region:1457076-1460213transcript_region:SL2.40ch08:145707…	1;1;1;1;1;1;1;1;1;1;1;1	1;1;1;1;1;1;1;1;1;1;1;1	1;1;1;1;1;1;1;1;1;1;1;1	4.7	4.7	298	298;355;414;443;450;471;493;496;500;526;537;553	28	NA	120	TRUE	146	228	492	492
NbS00013366g0004.1proteinAED:0.16eAED:0.16QI:430|0.88|1|1|0.77|0.7|10|429|246;(*GB)gi|4539543|emb|CAB39974.1|(e_value=4e-169)glyceraldehyde-3-phosphatedehydrogenase[Nicotianatabacum];;(*SWP)sp|P26520|G3PC_PETHY(e_value=2e-162)Glyceraldehyde-3-phosphatedehydrogenase,cytosolicOS=PetuniahybridaGN=GAPCPE=2SV=1;;(*TAIR)AT1G13440.1(e_value=4e-158)|Symbols:GAPC-2,GAPC2|glyceraldehyde-3-phosphatedehydrog…	protein AED:0.16 eAED:0.16 QI:430|0.88|1|1|0.77|0.7|10|429|246; (*GB) gi|4539543|emb|CAB39974.1| (e_value=4e-169) glyceraldehyde-3-phosphate dehydrogenase [Nicotiana tabacum];; (*SWP) sp|P26520|G3PC_PETHY (e_value=2e-162) Glyceraldehyde-	NA	NbS00013366g0004.1 protein AED:0.16 eAED:0.16 QI:430|0.88|1|1|0.77|0.7|10|429|246; (*GB) gi|4539543|emb|CAB39974.1| (e_value=4e-169) glyceraldehyde-3-phosphate dehydrogenase [Nicotiana tabacum];; (*SWP) sp|P26520|G3PC_PETHY (e_value=2e-162) Glyceraldehyde-	7	1	1	1	2.8	27.028	1	-2		+	21.8059	1	NbS00013366g0004.1proteinAED:0.16eAED:0.16QI:430|0.88|1|1|0.77|0.7|10|429|246;(*GB)gi|4539543|emb|CAB39974.1|(e_value=4e-169)glyceraldehyde-3-phosphatedehydrogenase[Nicotianatabacum];;(*SWP)sp|P26520|G3PC_PETHY(e_value=2e-162)Glyceraldehyde-3-phosphatedehydrogenase,cytosolicOS=PetuniahybridaGN=GAPCPE=2SV=1;;(*TAIR)AT1G13440.1(e_value=4e-158)|Symbols:GAPC-2,GAPC2|glyceraldehyde-3-phosphatedehydrog…	1;1;1;1;1;1;1	1;1;1;1;1;1;1	1;1;1;1;1;1;1	2.8	2.8	246	246;268;275;288;302;310;382	31	NA	131	TRUE	158	266	570	570	32		142
Q7Z3Y8	Keratin, type I cytoskeletal 27	KRT27	sp|Q7Z3Y8|K1C27_HUMAN Keratin, type I cytoskeletal 27 OS=Homo sapiens GN=KRT27 PE=1 SV=2	1	2	1	1	5	49.822	1	-2	+	+	18.324	0	CON__sp|Q7Z3Y8|K1C27_HUMAN	2	1	1	3.1	3.1	459	459	23	NA	216;254	True;False	263;305;306	450;502;503;504;505	880;1081;1082;1083;1084;1085;1086	880;1084	4		88
NbS00011899g0008.1proteinAED:0.06eAED:0.06QI:1351|0.71|0.75|1|0.71|0.62|8|0|535;(*GB)gi|359473569|ref|XP_002265426.2|(e_value=2e-156)PREDICTED:uncharacterizedproteinLOC100254476[Vitisvinifera];;(*TAIR)AT3G01810.2(e_value=1e-117)|Symbols:|FUNCTIONSIN:molecular_functionunknown;INVOLVEDIN:biological_processunknown;LOCATEDIN:plasmamembrane;EXPRESSEDIN:21plantstructures;EXPRESSEDDURING:13growthstages;…	protein AED:0.06 eAED:0.06 QI:1351|0.71|0.75|1|0.71|0.62|8|0|535; (*GB) gi|359473569|ref|XP_002265426.2| (e_value=2e-156) PREDICTED: uncharacterized protein LOC100254476 [Vitis vinifera];; (*TAIR) AT3G01810.2 (e_value=1e-117) | Symbols:	NA	NbS00011899g0008.1 protein AED:0.06 eAED:0.06 QI:1351|0.71|0.75|1|0.71|0.62|8|0|535; (*GB) gi|359473569|ref|XP_002265426.2| (e_value=2e-156) PREDICTED: uncharacterized protein LOC100254476 [Vitis vinifera];; (*TAIR) AT3G01810.2 (e_value=1e-117) | Symbols:	2	1	1	1	2.2	59.371	1	-2		+	NA	0	NbS00011899g0008.1proteinAED:0.06eAED:0.06QI:1351|0.71|0.75|1|0.71|0.62|8|0|535;(*GB)gi|359473569|ref|XP_002265426.2|(e_value=2e-156)PREDICTED:uncharacterizedproteinLOC100254476[Vitisvinifera];;(*TAIR)AT3G01810.2(e_value=1e-117)|Symbols:|FUNCTIONSIN:molecular_functionunknown;INVOLVEDIN:biological_processunknown;LOCATEDIN:plasmamembrane;EXPRESSEDIN:21plantstructures;EXPRESSEDDURING:13growthstages;…	1;1	1;1	1;1	2.2	2.2	535	535;1057	29	NA	61	TRUE	80	137	345	345		3;4		99;104
NbS00015937g0013.1proteinAED:0.49eAED:1.00QI:0|0|0|1|0|0|2|0|64	protein AED:0.49 eAED:1.00 QI:0|0|0|1|0|0|2|0|64	NA	NbS00015937g0013.1 protein AED:0.49 eAED:1.00 QI:0|0|0|1|0|0|2|0|64	1	1	1	1	15.6	7.3675	1	-2		+	NA	0	NbS00015937g0013.1proteinAED:0.49eAED:1.00QI:0|0|0|1|0|0|2|0|64	1	1	1	15.6	15.6	64	64	32	NA	53	TRUE	72	128	333	333		5		50
NbS00018348g0012.1proteinAED:0.31eAED:0.40QI:0|0|0|1|0|0.5|2|0|285;(*GB)gi|255562697|ref|XP_002522354.1|(e_value=9e-55)pentatricopeptiderepeat-containingprotein,putative[Ricinuscommunis];;(*SWP)sp|Q9SCT2|PP277_ARATH(e_value=4e-49)Pentatricopeptiderepeat-containingproteinAt3g50420OS=ArabidopsisthalianaGN=PCMP-E85PE=2SV=1;;(*TAIR)AT3G50420.1(e_value=3e-50)|Symbols:|Pentatricopeptiderepeat(PPR)super…	protein AED:0.31 eAED:0.40 QI:0|0|0|1|0|0.5|2|0|285; (*GB) gi|255562697|ref|XP_002522354.1| (e_value=9e-55) pentatricopeptide repeat-containing protein, putative [Ricinus communis];; (*SWP) sp|Q9SCT2|PP277_ARATH (e_value=4e-49) Pentatric	NA	NbS00018348g0012.1 protein AED:0.31 eAED:0.40 QI:0|0|0|1|0|0.5|2|0|285; (*GB) gi|255562697|ref|XP_002522354.1| (e_value=9e-55) pentatricopeptide repeat-containing protein, putative [Ricinus communis];; (*SWP) sp|Q9SCT2|PP277_ARATH (e_value=4e-49) Pentatric	1	1	1	1	3.2	31.347	1	-2		+	NA	0	NbS00018348g0012.1proteinAED:0.31eAED:0.40QI:0|0|0|1|0|0.5|2|0|285;(*GB)gi|255562697|ref|XP_002522354.1|(e_value=9e-55)pentatricopeptiderepeat-containingprotein,putative[Ricinuscommunis];;(*SWP)sp|Q9SCT2|PP277_ARATH(e_value=4e-49)Pentatricopeptiderepeat-containingproteinAt3g50420OS=ArabidopsisthalianaGN=PCMP-E85PE=2SV=1;;(*TAIR)AT3G50420.1(e_value=3e-50)|Symbols:|Pentatricopeptiderepeat(PPR)super…	1	1	1	3.2	3.2	285	285	33	NA	252	TRUE	303	500	1079	1079		6		7
NbS00025990g0004.1proteinAED:0.00eAED:0.00QI:0|1|1|1|0|0.5|2|2394|215;(*GB)gi|147860904|emb|CAN80873.1|(e_value=3e-56)hypotheticalproteinVITISV_004539[Vitisvinifera];;(*TAIR)AT3G26510.4(e_value=3e-43)|Symbols:|Octicosapeptide/Phox/Bem1pfamilyprotein|chr3:9711886-9712588RVERSELENGTH=196;;(*ITAG)Solyc05g013530.2.1(e_value=1e-74)genomic_reference:SL2.40ch05gene_region:6766537-6768182transcript_regio…	protein AED:0.00 eAED:0.00 QI:0|1|1|1|0|0.5|2|2394|215; (*GB) gi|147860904|emb|CAN80873.1| (e_value=3e-56) hypothetical protein VITISV_004539 [Vitis vinifera];; (*TAIR) AT3G26510.4 (e_value=3e-43) | Symbols: | Octicosapeptide/Phox/Bem1p	NA	NbS00025990g0004.1 protein AED:0.00 eAED:0.00 QI:0|1|1|1|0|0.5|2|2394|215; (*GB) gi|147860904|emb|CAN80873.1| (e_value=3e-56) hypothetical protein VITISV_004539 [Vitis vinifera];; (*TAIR) AT3G26510.4 (e_value=3e-43) | Symbols: | Octicosapeptide/Phox/Bem1p	2	1	1	1	3.7	23.855	1	-2		+	NA	0	NbS00025990g0004.1proteinAED:0.00eAED:0.00QI:0|1|1|1|0|0.5|2|2394|215;(*GB)gi|147860904|emb|CAN80873.1|(e_value=3e-56)hypotheticalproteinVITISV_004539[Vitisvinifera];;(*TAIR)AT3G26510.4(e_value=3e-43)|Symbols:|Octicosapeptide/Phox/Bem1pfamilyprotein|chr3:9711886-9712588RVERSELENGTH=196;;(*ITAG)Solyc05g013530.2.1(e_value=1e-74)genomic_reference:SL2.40ch05gene_region:6766537-6768182transcript_regio…	1;1	1;1	1;1	3.7	3.7	215	215;226	34	NA	247	TRUE	298	495	1068	1068		7		4
NbS00031431g0001.1proteinAED:0.01eAED:0.02QI:0|-1|0|1|-1|1|1|0|348;(*GB)gi|350539854|ref|NP_001233783.1|(e_value=1e-68)TCPtranscriptionfactor1[Solanumlycopersicum];;(*SWP)sp|O82277|TCP10_ARATH(e_value=5e-33)TranscriptionfactorTCP10OS=ArabidopsisthalianaGN=TCP10PE=1SV=1;;(*TAIR)AT2G31070.1(e_value=4e-34)|Symbols:TCP10|TCPdomainprotein10|chr2:13220984-13222069RVERSELENGTH=361;;(*ITAG)Solyc10g008780…	protein AED:0.01 eAED:0.02 QI:0|-1|0|1|-1|1|1|0|348; (*GB) gi|350539854|ref|NP_001233783.1| (e_value=1e-68) TCP transcription factor 1 [Solanum lycopersicum];; (*SWP) sp|O82277|TCP10_ARATH (e_value=5e-33) Transcription factor TCP10	NA	NbS00031431g0001.1 protein AED:0.01 eAED:0.02 QI:0|-1|0|1|-1|1|1|0|348; (*GB) gi|350539854|ref|NP_001233783.1| (e_value=1e-68) TCP transcription factor 1 [Solanum lycopersicum];; (*SWP) sp|O82277|TCP10_ARATH (e_value=5e-33) Transcription factor TCP10 OS=Ar	1	1	1	1	4.9	39.994	1	-2		+	NA	0	NbS00031431g0001.1proteinAED:0.01eAED:0.02QI:0|-1|0|1|-1|1|1|0|348;(*GB)gi|350539854|ref|NP_001233783.1|(e_value=1e-68)TCPtranscriptionfactor1[Solanumlycopersicum];;(*SWP)sp|O82277|TCP10_ARATH(e_value=5e-33)TranscriptionfactorTCP10OS=ArabidopsisthalianaGN=TCP10PE=1SV=1;;(*TAIR)AT2G31070.1(e_value=4e-34)|Symbols:TCP10|TCPdomainprotein10|chr2:13220984-13222069RVERSELENGTH=361;;(*ITAG)Solyc10g008780…	1	1	1	4.9	4.9	348	348	35	NA	0	TRUE	0	0	0	0		8		175
NbS00048528g0002.1proteinAED:0.00eAED:0.00QI:60|1|1|1|1|1|2|325|821;(*GB)gi|343171942|gb|AEL98675.1|(e_value=5e-14)winged-helixDNA-bindingtranscriptionfactorfamilyprotein,partial[Silenelatifolia];;(*ITAG)Solyc11g013580.1.1(e_value=9e-34)evidence_code:10F0H0E0IEGgenomic_reference:SL2.40ch11gene_region:6773893-6774552transcript_region:SL2.40ch11:6773893..6774552+go_terms:GO:0005634functional_descri…	protein AED:0.00 eAED:0.00 QI:60|1|1|1|1|1|2|325|821; (*GB) gi|343171942|gb|AEL98675.1| (e_value=5e-14) winged-helix DNA-binding transcription factor family protein, partial [Silene latifolia];; (*ITAG) Solyc11g013580.1.1 (e_value=9e-34)	NA	NbS00048528g0002.1 protein AED:0.00 eAED:0.00 QI:60|1|1|1|1|1|2|325|821; (*GB) gi|343171942|gb|AEL98675.1| (e_value=5e-14) winged-helix DNA-binding transcription factor family protein, partial [Silene latifolia];; (*ITAG) Solyc11g013580.1.1 (e_value=9e-34)	1	1	1	1	1.5	92.75	1	-2		+	NA	0	NbS00048528g0002.1proteinAED:0.00eAED:0.00QI:60|1|1|1|1|1|2|325|821;(*GB)gi|343171942|gb|AEL98675.1|(e_value=5e-14)winged-helixDNA-bindingtranscriptionfactorfamilyprotein,partial[Silenelatifolia];;(*ITAG)Solyc11g013580.1.1(e_value=9e-34)evidence_code:10F0H0E0IEGgenomic_reference:SL2.40ch11gene_region:6773893-6774552transcript_region:SL2.40ch11:6773893..6774552+go_terms:GO:0005634functional_descri…	1	1	1	1.5	1.5	821	821	36	NA	209	TRUE	256	441	859	859		9;10		513;517
NbS00056122g0017.1proteinAED:0.18eAED:0.18QI:212|1|0.91|1|1|1|12|420|454;(*SWP)sp|Q944I4|GLYK_ARATH(e_value=0.0)D-glycerate3-kinase,chloroplasticOS=ArabidopsisthalianaGN=GLYKPE=1SV=2;;(*TAIR)AT1G80380.2(e_value=0.0)|Symbols:|P-loopcontainingnucleosidetriphosphatehydrolasessuperfamilyprotein|chr1:30217332-30219784FORWARDLENGTH=456;;(*ITAG)Solyc03g120430.2.1(e_value=0.0)genomic_reference:SL2.40ch03…	protein AED:0.18 eAED:0.18 QI:212|1|0.91|1|1|1|12|420|454; (*SWP) sp|Q944I4|GLYK_ARATH (e_value=0.0) D-glycerate 3-kinase, chloroplastic	GLYK	NbS00056122g0017.1 protein AED:0.18 eAED:0.18 QI:212|1|0.91|1|1|1|12|420|454; (*SWP) sp|Q944I4|GLYK_ARATH (e_value=0.0) D-glycerate 3-kinase, chloroplastic OS=Arabidopsis thaliana GN=GLYK PE=1 SV=2;; (*TAIR) AT1G80380.2 (e_value=0.0) | Symbols: | P-loop c	1	1	1	1	2.9	51.099	1	-2		+	NA	0	NbS00056122g0017.1proteinAED:0.18eAED:0.18QI:212|1|0.91|1|1|1|12|420|454;(*SWP)sp|Q944I4|GLYK_ARATH(e_value=0.0)D-glycerate3-kinase,chloroplasticOS=ArabidopsisthalianaGN=GLYKPE=1SV=2;;(*TAIR)AT1G80380.2(e_value=0.0)|Symbols:|P-loopcontainingnucleosidetriphosphatehydrolasessuperfamilyprotein|chr1:30217332-30219784FORWARDLENGTH=456;;(*ITAG)Solyc03g120430.2.1(e_value=0.0)genomic_reference:SL2.40ch03…	1	1	1	2.9	2.9	454	454	37	NA	5	TRUE	5	6	10	10		11;12		11;13

## Sheet: rAra-h2 oxP sites
Manula validation of MSMS spectra	Proteins	Positions within proteins	Leading proteins	Protein	Fasta headers	Localization prob	Score diff	PEP	Score	Delta score	Score for localization	Diagnostic peak	Number of Oxidation (P)	Amino acid	Sequence window	Modification window	Peptide window coverage	Oxidation (P) Probabilities	Oxidation (P) Score diffs	Position in peptide	Charge	Mass error [ppm]	Intensity	Intensity___1	Intensity___2	Intensity___3	Ratio mod/base	id	Protein group IDs	Positions	Position	Peptide IDs	Mod. peptide IDs	Evidence IDs	MS/MS IDs	Best localization evidence ID	Best localization MS/MS ID	Best localization raw file	Best localization scan number	Best score evidence ID	Best score MS/MS ID	Best score raw file	Best score scan number	Best PEP evidence ID	Best PEP MS/MS ID	Best PEP raw file	Best PEP scan number
not OK	rAra_h2	24	rAra_h2	rAra_h2		1	71.2192	0.000175075	104.24	98.162	71.219		1	P	GDRRCQSQLERANLRPCEQHLMQKIQRDEDS	X;X;X;X;X;X;X;X;X;X;X;X;X;X;X;Oxidation (P);X;X;X;X;X;Oxidation (M);X;X;X;X;X;X;X;X;X	XXXXXXXXXXXPPPPPPPPPPPPPXXXXXXX	ANLRP(1)CEQHLMQK	ANLRP(71.22)CEQHLMQK	5	4	-1.498	313460000	313460000	0	0	0.027222	4	38	24	24	10	10;12	13;14;15;16;17;18;19;20;21;28	23;24;25;26;27;28;29;30;31;32;33;34;35;60	28	60	20200724_QExHFX1_RSLC1_Uezuelmez_Breiteneder_ext_Uni_MFPL_rArah2_50p	3346	18	29	20200724_QExHFX1_RSLC1_Uezuelmez_Breiteneder_ext_Uni_MFPL_rArah2_50p	3044	18	29	20200724_QExHFX1_RSLC1_Uezuelmez_Breiteneder_ext_Uni_MFPL_rArah2_50p	3044
OK	rAra_h2	44	rAra_h2	rAra_h2		0.909737	10.1257	0.000143822	84.946	84.946	78.428		2	P	LMQKIQRDEDSYGRDPYSPSQDPYSPSQDPD	X;Oxidation (M);X;X;X;X;X;X;X;X;X;X;X;X;X;Oxidation (P);X;X;Oxidation (P);X;X;X;Oxidation (P);X;X;X;X;X;X;X;X	XXXXXXXPPPPPPPPPPPPPPPPPPPPPPPP	DEDSYGRDP(0.91)YSP(0.998)SQDP(0.09)YSP(0.002)SQDPDRR	DEDSYGRDP(10.13)YSP(28)SQDP(-10.13)YSP(-27.2)SQDP(-39.21)DRR	9	4	-1.0967	48238000	0	48238000	0	0.030123	5	38	44	44	29;30;34;35;106;107	34;36;37;46;47;49;50;130;131;132;133	87;88;89;90	213;214;215;216	89	215	20200724_QExHFX1_RSLC1_Uezuelmez_Breiteneder_ext_Uni_MFPL_rArah2_50p	5263	87	213	20200724_QExHFX1_RSLC1_Uezuelmez_Breiteneder_ext_Uni_MFPL_rArah2_50p	4874	87	213	20200724_QExHFX1_RSLC1_Uezuelmez_Breiteneder_ext_Uni_MFPL_rArah2_50p	4874
OK	rAra_h2	47	rAra_h2	rAra_h2		1	94.832	4.28733e-46	324.81	324.81	324.81		1;2	P	KIQRDEDSYGRDPYSPSQDPYSPSQDPDRRD	X;X;X;X;X;X;X;X;X;X;X;X;Oxidation (P);X;X;Oxidation (P);X;X;X;X;X;X;Oxidation (P);X;X;X;X;X;X;X;X	XPPPPPPPPPPPPPPPPPPPPPPPPPPPPPX	DPYSP(1)SQDPYSP(1)SQDPDR	DP(-94.83)YSP(94.83)SQDP(-56.72)YSP(36.29)SQDP(-36.29)DR	5	2	0.13486	2036600000	1075900000	960690000	0	1.2718	6	38	47	47	29;30;34;35;106;107	34;36;37;46;47;49;50;130;131;132;133	83;86;88;89;90;91;116;117;118;120;121;226;227;229;230;231;233	201;202;208;209;210;211;212;214;215;216;217;218;219;220;221;222;223;303;304;305;306;307;311;312;313;463;464;466;467;468;469;470;471;475;476;477	116	303	20200724_QExHFX1_RSLC1_Uezuelmez_Breiteneder_ext_Uni_MFPL_rArah2_50p	4854	116	303	20200724_QExHFX1_RSLC1_Uezuelmez_Breiteneder_ext_Uni_MFPL_rArah2_50p	4854	116	303	20200724_QExHFX1_RSLC1_Uezuelmez_Breiteneder_ext_Uni_MFPL_rArah2_50p	4854
OK	rAra_h2	51	rAra_h2	rAra_h2		0.902146	10.1979	0.000143822	84.946	84.946	84.946		2	P	DEDSYGRDPYSPSQDPYSPSQDPDRRDPYSP	X;X;X;X;X;X;X;X;Oxidation (P);X;X;X;X;X;X;Oxidation (P);X;X;X;X;X;X;X;X;X;X;X;X;X;X;Oxidation (P)	PPPPPPPPPPPPPPPPPPPPPPPPPPXXXXX	DEDSYGRDP(0.581)YSP(0.422)SQDP(0.902)YSP(0.095)SQDPDRR	DEDSYGRDP(1.66)YSP(-1.66)SQDP(10.2)YSP(-10.2)SQDP(-33.36)DRR	16	3	-0.92391	17280000	0	17280000	0	0.010791	7	38	51	51	29;30;34;35;106;107	34;36;37;46;47;49;50;130;131;132;133	87	213	87	213	20200724_QExHFX1_RSLC1_Uezuelmez_Breiteneder_ext_Uni_MFPL_rArah2_50p	4874	87	213	20200724_QExHFX1_RSLC1_Uezuelmez_Breiteneder_ext_Uni_MFPL_rArah2_50p	4874	87	213	20200724_QExHFX1_RSLC1_Uezuelmez_Breiteneder_ext_Uni_MFPL_rArah2_50p	4874
OK	rAra_h2	54	rAra_h2	rAra_h2		0.999945	44.1343	4.28733e-46	324.81	324.81	215.87		1;2	P	SYGRDPYSPSQDPYSPSQDPDRRDPYSPSPY	X;X;X;X;X;X;X;X;Oxidation (P);X;X;X;X;X;X;Oxidation (P);X;X;X;X;X;X;X;X;X;X;X;Oxidation (P);X;Oxidation (P);X	PPPPPPPPPPPPPPPPPPPPPPPXXXXXXXX	DPYSP(1)SQDPYSP(1)SQDPDRR	DP(-63.88)YSP(53.15)SQDP(-47.88)YSP(44.13)SQDP(-44.13)DRR	12	2	-0.086527	1010900000	81122000	929730000	0	0.63125	8	38	54	54	29;30;34;35;106;107	34;36;37;46;47;49;50;130;131;132;133	83;86;116;117;120;121;122;226;228;229;230;231;232	201;202;208;209;210;211;212;303;304;305;311;312;313;314;315;463;465;466;467;468;469;470;471;472;473;474	121	313	20200724_QExHFX1_RSLC1_Uezuelmez_Breiteneder_ext_Uni_MFPL_rArah2_50p	4040	116	303	20200724_QExHFX1_RSLC1_Uezuelmez_Breiteneder_ext_Uni_MFPL_rArah2_50p	4854	116	303	20200724_QExHFX1_RSLC1_Uezuelmez_Breiteneder_ext_Uni_MFPL_rArah2_50p	4854
OK	rAra_h2	66	rAra_h2	rAra_h2		1	147.123	2.82479e-16	218.11	194.59	207.95		1;2	P	PYSPSQDPDRRDPYSPSPYDRRGAGSSQHQE	Oxidation (P);X;X;Oxidation (P);X;X;X;X;X;X;X;X;X;X;X;Oxidation (P);X;Oxidation (P);X;X;X;X;X;X;X;X;X;X;X;X;X	XXXXXXXXXXPPPPPPPPPPPPXXXXXXXXX	DPYSP(1)SP(1)YDR	DP(-147.12)YSP(147.12)SP(158.53)YDR	5	2	0.77737	1235500000	1185500000	50020000	0	0.065194	9	38	66	66	31;32;200;201	39;40;42;43;250;252	93;94;95;96;101;102;103;104;465;466;469;470	225;226;227;228;229;230;231;232;233;234;235;236;237;238;239;240;258;259;260;261;262;263;264;265;266;267;268;269;270;271;272;273;960;961;962;967;968;969;970;971;972;973;974;975	93	225	20200724_QExHFX1_RSLC1_Uezuelmez_Breiteneder_ext_Uni_MFPL_rArah2_50p	3895	104	269	20200724_QExHFX1_RSLC1_Uezuelmez_Breiteneder_ext_Uni_MFPL_rArah2_50p	3682	469	969	20200724_QExHFX1_RSLC1_Uezuelmez_Breiteneder_ext_Uni_MFPL_rArah2_50p	3025
OK	rAra_h2	68	rAra_h2	rAra_h2		1	158.533	1.95081e-15	207.95	207.95	207.95		2	P	SPSQDPDRRDPYSPSPYDRRGAGSSQHQERC	X;Oxidation (P);X;X;X;X;X;X;X;X;X;X;X;Oxidation (P);X;Oxidation (P);X;X;X;X;X;X;X;X;X;X;X;X;X;X;X	XXXXXXXXXPPPPPPPPPPPXXXXXXXXXXX	DPYSP(1)SP(1)YDR	DP(-147.12)YSP(147.12)SP(158.53)YDR	7	2	0.77737	50020000	0	50020000	0	0.0026394	10	38	68	68	31;32;200;201	39;40;42;43;250;252	93;94;95;101;102	225;226;227;228;229;230;231;258;259;260;261;262;263;264	93	225	20200724_QExHFX1_RSLC1_Uezuelmez_Breiteneder_ext_Uni_MFPL_rArah2_50p	3895	93	225	20200724_QExHFX1_RSLC1_Uezuelmez_Breiteneder_ext_Uni_MFPL_rArah2_50p	3895	93	225	20200724_QExHFX1_RSLC1_Uezuelmez_Breiteneder_ext_Uni_MFPL_rArah2_50p	3895

## Sheet: rAra-h2  evidence
Sequence		Length	Modifications	Modified sequence	Oxidation (M) Probabilities	Oxidation (P) Probabilities	Oxidation (M) Score Diffs	Oxidation (P) Score Diffs	Acetyl (Protein N-term)	Gln->pyro-Glu	Oxidation (M)	Oxidation (P)	Missed cleavages	Proteins	Leading proteins	Leading razor protein	Type	Raw file	MS/MS m/z	Charge	m/z	Mass	Resolution	Uncalibrated - Calibrated m/z [ppm]	Uncalibrated - Calibrated m/z [Da]	Mass error [ppm]	Mass error [Da]	Uncalibrated mass error [ppm]	Uncalibrated mass error [Da]	Max intensity m/z 0	Retention time	Retention length	Calibrated retention time	Calibrated retention time start	Calibrated retention time finish	Retention time calibration	Match time difference	Match m/z difference	Match q-value	Match score	Number of data points	Number of scans	Number of isotopic peaks	PIF	Fraction of total spectrum	Base peak fraction	PEP	MS/MS count	MS/MS scan number
ANLRPCEQHLMQK	MRQQWELQGDRRCQSQLERANLRPCEQHLMQKIQRDEDSYGRDPYSPSQDPYSPSQDPDRRDPYSPSPYDRRGAGSSQHQERCCNELNEFENNQRCMCEALQQIMEQQSDRLQGRQQEQQFKRELRNLPQQCGLRAPQRCDLEVESGGRDRYHHHHHHSEKDEL	13	Oxidation (M),Oxidation (P)	_ANLRP(ox)CEQHLM(ox)QK_	ANLRPCEQHLM(1)QK	ANLRP(1)CEQHLMQK	ANLRPCEQHLM(73.88)QK	ANLRP(73.88)CEQHLMQK	0	0	1	1	1	rAra_h2	rAra_h2	rAra_h2	MULTI-MSMS	20200724_QExHFX1_RSLC1_Uezuelmez_Breiteneder_ext_Uni_MFPL_rArah2_50p	553.271	3	552.936	1655.79	42262.9	-0.25342	-0.00014012	0.81764	0.0004521	0.56422	0.00031198	552.936	10.315	0.70304	10.315	9.8947	10.598	0					47	18	5	0	0	0	0.0060691	1	2528
ANLRPCEQHLMQK		13	Oxidation (M),Oxidation (P)	_ANLRP(ox)CEQHLM(ox)QK_	ANLRPCEQHLM(1)QK	ANLRP(1)CEQHLMQK	ANLRPCEQHLM(46)QK	ANLRP(46)CEQHLMQK	0	0	1	1	1	rAra_h2	rAra_h2	rAra_h2	MULTI-MSMS	20200724_QExHFX1_RSLC1_Uezuelmez_Breiteneder_ext_Uni_MFPL_rArah2_50p	829.404	2	828.901	1655.79	36992	-0.50968	-0.00042247	0.33859	0.00028066	-0.17108	-0.00014181	828.9	10.3	0.3344	10.3	10.043	10.377	0					12	8	3	0	0	0	0.028176	1	2543
ANLRPCEQHLMQK		13	Oxidation (M),Oxidation (P)	_ANLRP(ox)CEQHLM(ox)QK_	ANLRPCEQHLM(1)QK	ANLRP(1)CEQHLMQK	ANLRPCEQHLM(66.49)QK	ANLRP(66.49)CEQHLMQK	0	0	1	1	1	rAra_h2	rAra_h2	rAra_h2	MULTI-MSMS	20200724_QExHFX1_RSLC1_Uezuelmez_Breiteneder_ext_Uni_MFPL_rArah2_50p	553.27	3	552.936	1655.79	41133.5	-0.36258	-0.00020048	0.039722	2.1964e-05	-0.32286	-0.00017852	552.937	11.279	1.2594	11.279	10.528	11.787	0					108	38	4	0	0	0	0.01279	1	2708
ANLRPCEQHLMQK		13	Oxidation (M),Oxidation (P)	_ANLRP(ox)CEQHLM(ox)QK_	ANLRPCEQHLM(1)QK	ANLRP(1)CEQHLMQK	ANLRPCEQHLM(80.04)QK	ANLRP(80.04)CEQHLMQK	0	0	1	1	1	rAra_h2	rAra_h2	rAra_h2	MULTI-MSMS	20200724_QExHFX1_RSLC1_Uezuelmez_Breiteneder_ext_Uni_MFPL_rArah2_50p	828.901	2	828.901	1655.79	34064.1	-0.61965	-0.00051363	-0.1587	-0.00013155	-0.77835	-0.00064517	828.901	11.277	0.9024	11.277	10.839	11.742	0					117	26	6	0	0	0	0.00042168	2	2879
ANLRPCEQHLMQK		13	Oxidation (M),Oxidation (P)	_ANLRP(ox)CEQHLM(ox)QK_	ANLRPCEQHLM(1)QK	ANLRP(1)CEQHLMQK	ANLRPCEQHLM(40.77)QK	ANLRP(40.77)CEQHLMQK	0	0	1	1	1	rAra_h2	rAra_h2	rAra_h2	MULTI-MSMS	20200724_QExHFX1_RSLC1_Uezuelmez_Breiteneder_ext_Uni_MFPL_rArah2_50p	415.205	4	414.954	1655.79	48294.1	-0.28481	-0.00011818	-0.30544	-0.00012674	-0.59025	-0.00024493	414.954	11.278	0.86707	11.278	10.874	11.742	0					93	25	5	0	0	0	0.04505	1	2834
ANLRPCEQHLMQK		13	Oxidation (M),Oxidation (P)	_ANLRP(ox)CEQHLM(ox)QK_	ANLRPCEQHLM(1)QK	ANLRP(1)CEQHLMQK	ANLRPCEQHLM(104.24)QK	ANLRP(104.24)CEQHLMQK	0	0	1	1	1	rAra_h2	rAra_h2	rAra_h2	MULTI-MSMS	20200724_QExHFX1_RSLC1_Uezuelmez_Breiteneder_ext_Uni_MFPL_rArah2_50p	552.936	3	552.936	1655.79	39654.3	-0.4422	-0.00024451	-0.29369	-0.00016239	-0.73589	-0.0004069	552.936	12.188	0.75107	12.188	11.999	12.75	0					74	23	4	0	0	0	0.00017507	3	3044
ANLRPCEQHLMQK		13	Oxidation (M),Oxidation (P)	_ANLRP(ox)CEQHLM(ox)QK_	ANLRPCEQHLM(1)QK	ANLRP(1)CEQHLMQK	ANLRPCEQHLM(77.53)QK	ANLRP(77.53)CEQHLMQK	0	0	1	1	1	rAra_h2	rAra_h2	rAra_h2	MULTI-MSMS	20200724_QExHFX1_RSLC1_Uezuelmez_Breiteneder_ext_Uni_MFPL_rArah2_50p	828.901	2	828.901	1655.79	33899.7	-0.70008	-0.0005803	0.3326	0.00027569	-0.36748	-0.00030461	828.902	12.188	0.78515	12.188	11.999	12.784	0					70	24	5	0	0	0	0.0024634	2	3045
ANLRPCEQHLMQK		13	Oxidation (M),Oxidation (P)	_ANLRP(ox)CEQHLM(ox)QK_	ANLRPCEQHLM(1)QK	ANLRP(1)CEQHLMQK	ANLRPCEQHLM(52.58)QK	ANLRP(52.58)CEQHLMQK	0	0	1	1	1	rAra_h2	rAra_h2	rAra_h2	MULTI-MSMS	20200724_QExHFX1_RSLC1_Uezuelmez_Breiteneder_ext_Uni_MFPL_rArah2_50p	414.953	4	414.954	1655.79	46942.4	-0.36724	-0.00015239	-0.43489	-0.00018046	-0.80213	-0.00033285	415.205	12.189	0.78515	12.189	11.999	12.784	0					74	24	4	0	0	0	0.03168	1	3048
ANLRPCEQHLMQK		13	Oxidation (M),Oxidation (P)	_ANLRP(ox)CEQHLM(ox)QK_	ANLRPCEQHLM(1)QK	ANLRP(1)CEQHLMQK	ANLRPCEQHLM(41.68)QK	ANLRP(41.68)CEQHLMQK	0	0	1	1	1	rAra_h2	rAra_h2	rAra_h2	MULTI-MSMS	20200724_QExHFX1_RSLC1_Uezuelmez_Breiteneder_ext_Uni_MFPL_rArah2_50p	552.936	3	552.936	1655.79	39912	-0.70547	-0.00039008	0.7028	0.0003886	-0.002673	-1.478e-06	552.937	13.2	0.52904	13.2	13.076	13.605	1.7764e-15					27	18	2	0	0	0	0.035352	1	3387
ANLRPCEQHLMQK		13	Oxidation (M)	_ANLRPCEQHLM(ox)QK_	ANLRPCEQHLM(1)QK		ANLRPCEQHLM(158.59)QK		0	0	1	0	1	rAra_h2	rAra_h2	rAra_h2	MULTI-MSMS	20200724_QExHFX1_RSLC1_Uezuelmez_Breiteneder_ext_Uni_MFPL_rArah2_50p	546.933	3	547.605	1639.79	40711.5	-0.36364	-0.00019913	-0.69949	-0.00038304	-1.0631	-0.00058218	547.605	11.782	1.7712	11.782	11.226	12.997	-1.7764e-15					317	57	7	0	0	0	1.2175e-08	7	2873
ANLRPCEQHLMQK		13	Oxidation (M)	_ANLRPCEQHLM(ox)QK_	ANLRPCEQHLM(1)QK		ANLRPCEQHLM(143.28)QK		0	0	1	0	1	rAra_h2	rAra_h2	rAra_h2	MULTI-MSMS	20200724_QExHFX1_RSLC1_Uezuelmez_Breiteneder_ext_Uni_MFPL_rArah2_50p	819.894	2	820.903	1639.79	34159.4	-0.64445	-0.00052903	-0.5041	-0.00041382	-1.1486	-0.00094285	820.903	11.783	1.487	11.783	11.297	12.784	0					274	55	7	0	0	0	1.539e-07	5	2909
ANLRPCEQHLMQK		13	Oxidation (M)	_ANLRPCEQHLM(ox)QK_	ANLRPCEQHLM(1)QK		ANLRPCEQHLM(109.16)QK		0	0	1	0	1	rAra_h2	rAra_h2	rAra_h2	MULTI-MSMS	20200724_QExHFX1_RSLC1_Uezuelmez_Breiteneder_ext_Uni_MFPL_rArah2_50p	410.451	4	410.955	1639.79	47454.6	-0.34784	-0.00014295	-0.18805	-7.7279e-05	-0.53589	-0.00022023	410.955	11.783	1.4186	11.783	11.331	12.75	0					255	53	6	0	0	0	0.00015016	5	2910
ANLRPCEQHLMQK		13	Oxidation (M)	_ANLRPCEQHLM(ox)QK_	ANLRPCEQHLM(1)QK		ANLRPCEQHLM(67.52)QK		0	0	1	0	1	rAra_h2	rAra_h2	rAra_h2	MULTI-MSMS	20200724_QExHFX1_RSLC1_Uezuelmez_Breiteneder_ext_Uni_MFPL_rArah2_50p	411.206	4	410.955	1639.79	47454.5	-0.48079	-0.00019758	-1.4943	-0.00061409	-1.9751	-0.00081167	411.206	13.095	0.6865	13.095	12.622	13.308	0					67	22	4	0	0	0	0.01476	2	3210
ANLRPCEQHLMQK		13	Oxidation (M)	_ANLRPCEQHLM(ox)QK_	ANLRPCEQHLM(1)QK		ANLRPCEQHLM(136.49)QK		0	0	1	0	1	rAra_h2	rAra_h2	rAra_h2	MULTI-MSMS	20200724_QExHFX1_RSLC1_Uezuelmez_Breiteneder_ext_Uni_MFPL_rArah2_50p	821.403	2	820.903	1639.79	33659	-0.82115	-0.00067408	-1.7802	-0.0014614	-2.6014	-0.0021355	821.404	13.202	0.84883	13.202	12.622	13.471	1.7764e-15					94	28	5	0	0	0	2.1656e-07	3	3217
ANLRPCEQHLMQK		13	Oxidation (M)	_ANLRPCEQHLM(ox)QK_	ANLRPCEQHLM(1)QK		ANLRPCEQHLM(118.76)QK		0	0	1	0	1	rAra_h2	rAra_h2	rAra_h2	MULTI-MSMS	20200724_QExHFX1_RSLC1_Uezuelmez_Breiteneder_ext_Uni_MFPL_rArah2_50p	547.936	3	547.605	1639.79	40711.4	-0.53207	-0.00029137	-1.8181	-0.00099561	-2.3502	-0.001287	547.605	13.172	0.8546	13.172	12.588	13.442	1.7764e-15					104	28	5	0	0	0	1.3864e-05	2	3225
ANLRPCEQHLMQK		13	Oxidation (P)	_ANLRP(ox)CEQHLMQK_		ANLRP(1)CEQHLMQK		ANLRP(71.22)CEQHLMQK	0	0	0	1	1	rAra_h2	rAra_h2	rAra_h2	MULTI-MSMS	20200724_QExHFX1_RSLC1_Uezuelmez_Breiteneder_ext_Uni_MFPL_rArah2_50p	411.207	4	410.955	1639.79	47454.5	-0.48079	-0.00019758	-1.4943	-0.00061409	-1.9751	-0.00081167	411.206	13.095	0.6865	13.095	12.622	13.308	0					67	22	4	0	0	0	0.01057	1	3346
ANLRPCEQHLMQK		13	Unmodified	_ANLRPCEQHLMQK_					0	0	0	0	1	rAra_h2	rAra_h2	rAra_h2	MULTI-MSMS	20200724_QExHFX1_RSLC1_Uezuelmez_Breiteneder_ext_Uni_MFPL_rArah2_50p	542.274	3	542.273	1623.8	41653.7	-0.60374	-0.00032739	-0.56839	-0.00030822	-1.1721	-0.00063562	542.273	13.679	1.5174	13.679	13.076	14.593	-1.7764e-15					257	53	7	0	0	0	1.9943e-11	4	3747
ANLRPCEQHLMQK		13	Unmodified	_ANLRPCEQHLMQK_					0	0	0	0	1	rAra_h2	rAra_h2	rAra_h2	MULTI-MSMS	20200724_QExHFX1_RSLC1_Uezuelmez_Breiteneder_ext_Uni_MFPL_rArah2_50p	406.451	4	406.957	1623.8	47974	-0.64511	-0.00026253	-0.22523	-9.166e-05	-0.87035	-0.00035419	406.957	13.683	2.55	13.683	12.266	14.816	0					238	86	6	0	0	0	0.0075559	5	3581
ANLRPCEQHLMQK		13	Unmodified	_ANLRPCEQHLMQK_					0	0	0	0	1	rAra_h2	rAra_h2	rAra_h2	MULTI-MSMS	20200724_QExHFX1_RSLC1_Uezuelmez_Breiteneder_ext_Uni_MFPL_rArah2_50p	811.897	2	812.906	1623.8	34055.8	-0.91605	-0.00074466	-0.32221	-0.00026192	-1.2383	-0.0010066	812.906	13.678	1.2213	13.678	13.338	14.559	0					189	41	7	0	0	0	3.0832e-11	4	3604
ANLRPCEQHLMQK		13	Unmodified	_ANLRPCEQHLMQK_					0	0	0	0	1	rAra_h2	rAra_h2	rAra_h2	MULTI-SECPEP	20200724_QExHFX1_RSLC1_Uezuelmez_Breiteneder_ext_Uni_MFPL_rArah2_50p	541.782	3	542.273	1623.8	42033.5	0.36735	0.00019921	0.23905	0.00012963	0.6064	0.00032884	542.273	17.38	0.3468	17.38	17.1	17.447	3.5527e-15					27	11	3	0	0	0	0.050461	1	4804
ANLRPCEQHLMQKIQR		16	Oxidation (M)	_ANLRPCEQHLM(ox)QKIQR_	ANLRPCEQHLM(1)QKIQR		ANLRPCEQHLM(109.48)QKIQR		0	0	1	0	2	rAra_h2	rAra_h2	rAra_h2	MULTI-MSMS	20200724_QExHFX1_RSLC1_Uezuelmez_Breiteneder_ext_Uni_MFPL_rArah2_50p	680.353	3	680.019	2037.04	37723.5	-0.63639	-0.00043275	0.0067319	4.5778e-06	-0.62965	-0.00042818	680.354	13.616	0.34151	13.616	13.442	13.784	0					35	12	4	0	0	0	0.00019533	1	3488
ANLRPCEQHLMQKIQR		16	Oxidation (M)	_ANLRPCEQHLM(ox)QKIQR_	ANLRPCEQHLM(1)QKIQR		ANLRPCEQHLM(149.3)QKIQR		0	0	1	0	2	rAra_h2	rAra_h2	rAra_h2	MULTI-MSMS	20200724_QExHFX1_RSLC1_Uezuelmez_Breiteneder_ext_Uni_MFPL_rArah2_50p	510.517	4	510.266	2037.04	44080.6	-0.22356	-0.00011408	-0.51779	-0.00026421	-0.74135	-0.00037828	510.517	13.616	0.55489	13.616	13.276	13.83	0					39	20	4	0	0	0	1.7135e-07	1	3498
CCNELNEFENNQR		13	Unmodified	_CCNELNEFENNQR_					0	0	0	0	0	rAra_h2	rAra_h2	rAra_h2	MULTI-MSMS	20200724_QExHFX1_RSLC1_Uezuelmez_Breiteneder_ext_Uni_MFPL_rArah2_50p	863.848	2	863.849	1725.68	32566.8	-0.81203	-0.00070147	0.36856	0.00031838	-0.44347	-0.00038309	863.85	19.583	0.32092	19.583	19.378	19.699	0					29	11	3	0	0	0	2.666e-33	1	5576
CCNELNEFENNQR		13	Unmodified	_CCNELNEFENNQR_					0	0	0	0	0	rAra_h2	rAra_h2	rAra_h2	MULTI-MSMS	20200724_QExHFX1_RSLC1_Uezuelmez_Breiteneder_ext_Uni_MFPL_rArah2_50p	864.348	2	863.849	1725.68	33084.1	-0.68141	-0.00058863	-0.93803	-0.00081032	-1.6194	-0.0013989	863.849	20.161	3.1602	20.161	19.935	23.095	0					151	105	2	0	0	0	1.3678e-33	6	5916
CCNELNEFENNQR		13	Unmodified	_CCNELNEFENNQR_					0	0	0	0	0	rAra_h2	rAra_h2	rAra_h2	MULTI-MSMS	20200724_QExHFX1_RSLC1_Uezuelmez_Breiteneder_ext_Uni_MFPL_rArah2_50p	576.564	3	576.235	1725.68	39822.6	0.14033	8.0865e-05	-1.0064	-0.00057994	-0.8661	-0.00049907	576.235	20.161	3.3989	20.161	19.729	23.128	0					259	114	7	0	0	0	2.1137e-08	3	6062
CCNELNEFENNQR		13	Unmodified	_CCNELNEFENNQR_					0	0	0	0	0	rAra_h2	rAra_h2	rAra_h2	MULTI-MSMS	20200724_QExHFX1_RSLC1_Uezuelmez_Breiteneder_ext_Uni_MFPL_rArah2_50p	863.85	2	863.849	1725.68	31839.9	-0.93483	-0.00080755	-2.6887	-0.0023226	-3.6235	-0.0031301	863.848	28.242	1.7455	28.242	28.039	29.784	0					171	51	5	0	0	0	5.1402e-12	4	8041
CCNELNEFENNQR		13	Unmodified	_CCNELNEFENNQR_					0	0	0	0	0	rAra_h2	rAra_h2	rAra_h2	MSMS	20200724_QExHFX1_RSLC1_Uezuelmez_Breiteneder_ext_Uni_MFPL_rArah2_50p	863.845	2	863.849	1725.68	NaN	NaN	NaN	NaN	NaN	NaN	NaN	NaN	32.784	1	32.784	32.284	33.284	0								0	0	0	0.0065074	1	9277
CCNELNEFENNQR		13	Unmodified	_CCNELNEFENNQR_					0	0	0	0	0	rAra_h2	rAra_h2	rAra_h2	MULTI-SECPEP	20200724_QExHFX1_RSLC1_Uezuelmez_Breiteneder_ext_Uni_MFPL_rArah2_50p	864.351	2	863.849	1725.68	33374.5	-0.86752	-0.0007494	-1.1261	-0.00097275	-1.9936	-0.0017222	863.849	31.413	1.1059	31.413	30.8	31.906	0					37	32	2	0	0	0	1.1847e-15	1	8966
CDLEVESGGR		10	Unmodified	_CDLEVESGGR_					0	0	0	0	0	rAra_h2	rAra_h2	rAra_h2	MULTI-MSMS	20200724_QExHFX1_RSLC1_Uezuelmez_Breiteneder_ext_Uni_MFPL_rArah2_50p	561.248	2	561.248	1120.48	42033.5	-0.64002	-0.00035921	-0.0095049	-5.3346e-06	-0.64952	-0.00036454	561.249	14.985	0.2865	14.985	14.846	15.132	0					30	9	4	0	0	0	3.74e-07	1	3922
CDLEVESGGR		10	Unmodified	_CDLEVESGGR_					0	0	0	0	0	rAra_h2	rAra_h2	rAra_h2	MULTI-MSMS	20200724_QExHFX1_RSLC1_Uezuelmez_Breiteneder_ext_Uni_MFPL_rArah2_50p	561.246	2	561.248	1120.48	42063.1	-1.0533	-0.00059116	-0.81511	-0.00045748	-1.8684	-0.0010486	561.248	15.299	0.27443	15.299	15.103	15.377	0					18	10	2	0	0	0	0.023118	1	3995
CDLEVESGGR		10	Unmodified	_CDLEVESGGR_					0	0	0	0	0	rAra_h2	rAra_h2	rAra_h2	MULTI-MSMS	20200724_QExHFX1_RSLC1_Uezuelmez_Breiteneder_ext_Uni_MFPL_rArah2_50p	561.248	2	561.248	1120.48	41236.9	-0.86934	-0.00048792	-0.45578	-0.00025581	-1.3251	-0.00074372	561.248	15.579	2.8877	15.579	15.132	18.02	0					392	114	6	0	0	0	2.8592e-10	14	4367
CDLEVESGGR		10	Unmodified	_CDLEVESGGR_					0	0	0	0	0	rAra_h2	rAra_h2	rAra_h2	MULTI-MSMS	20200724_QExHFX1_RSLC1_Uezuelmez_Breiteneder_ext_Uni_MFPL_rArah2_50p	1121.49	1	1121.49	1120.48	29561.2	-1.2811	-0.0014367	-0.71457	-0.00080138	-1.9957	-0.0022381	1121.49	15.541	0.73649	15.541	15.398	16.135	0					81	30	5	0	0	0	2.8652e-22	1	4102
CDLEVESGGR		10	Unmodified	_CDLEVESGGR_					0	0	0	0	0	rAra_h2	rAra_h2	rAra_h2	MULTI-MSMS	20200724_QExHFX1_RSLC1_Uezuelmez_Breiteneder_ext_Uni_MFPL_rArah2_50p	561.249	2	561.248	1120.48	42775.8	-0.11374	-6.3836e-05	0.093542	5.25e-05	-0.020197	-1.1336e-05	561.248	18.409	1.9018	18.409	18.247	20.149	0					88	73	2	0	0	0	0.0001911	4	5443
CDLEVESGGR		10	Unmodified	_CDLEVESGGR_					0	0	0	0	0	rAra_h2	rAra_h2	rAra_h2	MULTI-MSMS	20200724_QExHFX1_RSLC1_Uezuelmez_Breiteneder_ext_Uni_MFPL_rArah2_50p	561.249	2	561.248	1120.48	41617.8	-0.55956	-0.00031405	-0.25368	-0.00014237	-0.81324	-0.00045643	561.248	24.545	1.406	24.545	23.938	25.344	0					135	43	5	0	0	0	0.00798	4	7121
CDLEVESGGR		10	Unmodified	_CDLEVESGGR_					0	0	0	0	0	rAra_h2	rAra_h2	rAra_h2	MSMS	20200724_QExHFX1_RSLC1_Uezuelmez_Breiteneder_ext_Uni_MFPL_rArah2_50p	561.249	2	561.248	1120.48	NaN	NaN	NaN	NaN	NaN	NaN	NaN	NaN	44.982	1	44.982	44.482	45.482	0								0	0	0	0.034652	1	12753
CDLEVESGGR		10	Unmodified	_CDLEVESGGR_					0	0	0	0	0	rAra_h2	rAra_h2	rAra_h2	MULTI-SECPEP	20200724_QExHFX1_RSLC1_Uezuelmez_Breiteneder_ext_Uni_MFPL_rArah2_50p	561.899	2	561.248	1120.48	42133.1	-0.22779	-0.00012785	2.3292	0.0013073	2.1014	0.0011794	561.25	20.517	0.49116	20.517	20.177	20.668	0					33	18	2	0	0	0	0.018002	1	5785
CDLEVESGGR		10	Unmodified	_CDLEVESGGR_					0	0	0	0	0	rAra_h2	rAra_h2	rAra_h2	MULTI-SECPEP	20200724_QExHFX1_RSLC1_Uezuelmez_Breiteneder_ext_Uni_MFPL_rArah2_50p	560.786	2	561.248	1120.48	42602.9	-0.62593	-0.0003513	1.9001	0.0010664	1.2742	0.00071513	561.249	26.807	1.5294	26.807	25.518	27.048	0					74	44	2	0	0	0	0.049651	1	7368
CDLEVESGGRDR		12	Unmodified	_CDLEVESGGRDR_					0	0	0	0	1	rAra_h2	rAra_h2	rAra_h2	MULTI-MSMS	20200724_QExHFX1_RSLC1_Uezuelmez_Breiteneder_ext_Uni_MFPL_rArah2_50p	464.878	3	464.877	1391.61	45035.1	-0.52534	-0.00024422	0.01376	6.3965e-06	-0.51158	-0.00023782	464.877	13.396	1.8558	13.396	13.106	14.962	1.7764e-15					198	64	7	0	0	0	4.5274e-11	6	3390
CDLEVESGGRDR		12	Unmodified	_CDLEVESGGRDR_					0	0	0	0	1	rAra_h2	rAra_h2	rAra_h2	MULTI-MSMS	20200724_QExHFX1_RSLC1_Uezuelmez_Breiteneder_ext_Uni_MFPL_rArah2_50p	696.811	2	696.812	1391.61	36594.6	0.45028	0.00031376	-0.48873	-0.00034055	-0.03845	-2.6792e-05	696.812	14.481	0.65865	14.481	14.278	14.937	0					52	20	4	0	0	0	0.035291	1	3823
CDLEVESGGRDR		12	Unmodified	_CDLEVESGGRDR_					0	0	0	0	1	rAra_h2	rAra_h2	rAra_h2	MSMS	20200724_QExHFX1_RSLC1_Uezuelmez_Breiteneder_ext_Uni_MFPL_rArah2_50p	464.877	3	464.877	1391.61	NaN	NaN	NaN	NaN	NaN	NaN	NaN	NaN	14.505	1	14.505	14.005	15.005	0								0	0	0	0.0065514	1	3786
CMCEALQQIMEQQSDR		16	2 Oxidation (M)	_CM(ox)CEALQQIM(ox)EQQSDR_	CM(1)CEALQQIM(1)EQQSDR		CM(276.35)CEALQQIM(276.35)EQQSDR		0	0	2	0	0	rAra_h2	rAra_h2	rAra_h2	MULTI-MSMS	20200724_QExHFX1_RSLC1_Uezuelmez_Breiteneder_ext_Uni_MFPL_rArah2_50p	1030.42	2	1029.92	2057.83	30750.1	-0.45502	-0.00046863	-0.7722	-0.00079531	-1.2272	-0.0012639	1029.92	20.618	2.1913	20.618	20.237	22.428	3.5527e-15					376	74	9	0	0	0	2.7011e-26	6	5935
CMCEALQQIMEQQSDR		16	2 Oxidation (M)	_CM(ox)CEALQQIM(ox)EQQSDR_	CM(1)CEALQQIM(1)EQQSDR		CM(137.73)CEALQQIM(137.73)EQQSDR		0	0	2	0	0	rAra_h2	rAra_h2	rAra_h2	MULTI-MSMS	20200724_QExHFX1_RSLC1_Uezuelmez_Breiteneder_ext_Uni_MFPL_rArah2_50p	686.951	3	686.95	2057.83	37105.4	-0.059695	-4.1008e-05	0.32889	0.00022593	0.2692	0.00018492	686.95	23.893	1.7879	23.893	23.394	25.182	-3.5527e-15					197	54	6	0	0	0	1.2932e-06	5	6797
CMCEALQQIMEQQSDR		16	2 Oxidation (M)	_CM(ox)CEALQQIM(ox)EQQSDR_	CM(1)CEALQQIM(1)EQQSDR		CM(186.76)CEALQQIM(186.76)EQQSDR		0	0	2	0	0	rAra_h2	rAra_h2	rAra_h2	MULTI-MSMS	20200724_QExHFX1_RSLC1_Uezuelmez_Breiteneder_ext_Uni_MFPL_rArah2_50p	1029.92	2	1029.92	2057.83	30818.7	-0.86493	-0.00089081	0.36946	0.00038051	-0.49547	-0.0005103	1029.92	23.773	1.069	23.773	23.428	24.497	0					115	31	5	0	0	0	4.943e-12	3	6794
CMCEALQQIMEQQSDR		16	2 Oxidation (M)	_CM(ox)CEALQQIM(ox)EQQSDR_	CM(1)CEALQQIM(1)EQQSDR		CM(107.97)CEALQQIM(107.97)EQQSDR		0	0	2	0	0	rAra_h2	rAra_h2	rAra_h2	MULTI-MSMS	20200724_QExHFX1_RSLC1_Uezuelmez_Breiteneder_ext_Uni_MFPL_rArah2_50p	687.287	3	686.95	2057.83	35850.1	-0.14886	-0.00010226	1.4568	0.0010007	1.3079	0.00089847	687.285	25.501	1.4912	25.501	25.118	26.609	0					122	44	4	0	0	0	0.00091851	6	7357
CMCEALQQIMEQQSDR		16	2 Oxidation (M)	_CM(ox)CEALQQIM(ox)EQQSDR_	CM(1)CEALQQIM(1)EQQSDR		CM(134.38)CEALQQIM(134.38)EQQSDR		0	0	2	0	0	rAra_h2	rAra_h2	rAra_h2	MULTI-MSMS	20200724_QExHFX1_RSLC1_Uezuelmez_Breiteneder_ext_Uni_MFPL_rArah2_50p	1030.42	2	1029.92	2057.83	30525.7	-0.97959	-0.0010089	-0.95536	-0.00098395	-1.935	-0.0019928	1029.92	27.642	0.818	27.642	27.325	28.143	0					90	24	5	0	0	0	2.4647e-07	2	7891
CMCEALQQIMEQQSDR		16	2 Oxidation (M)	_CM(ox)CEALQQIM(ox)EQQSDR_	CM(1)CEALQQIM(1)EQQSDR		CM(88.77)CEALQQIM(88.77)EQQSDR		0	0	2	0	0	rAra_h2	rAra_h2	rAra_h2	MULTI-MSMS	20200724_QExHFX1_RSLC1_Uezuelmez_Breiteneder_ext_Uni_MFPL_rArah2_50p	687.284	3	686.95	2057.83	37414.9	-0.17542	-0.0001205	-0.21236	-0.00014588	-0.38778	-0.00026638	686.949	27.654	1.0345	27.654	27.141	28.175	0					50	31	2	0	0	0	0.0023801	1	7921
CMCEALQQIMEQQSDR		16	Oxidation (M)	_CMCEALQQIM(ox)EQQSDR_	CMCEALQQIM(1)EQQSDR		CM(-168.11)CEALQQIM(168.11)EQQSDR		0	0	1	0	0	rAra_h2	rAra_h2	rAra_h2	MULTI-MSMS	20200724_QExHFX1_RSLC1_Uezuelmez_Breiteneder_ext_Uni_MFPL_rArah2_50p	681.953	3	681.618	2041.83	37270.4	-0.14566	-9.9287e-05	-0.45721	-0.00031164	-0.60288	-0.00041093	681.619	23.659	0.34829	23.659	23.428	23.777	0					56	9	8	0	0	0	5.317e-13	2	6776
CMCEALQQIMEQQSDR		16	Oxidation (M)	_CMCEALQQIM(ox)EQQSDR_	CMCEALQQIM(1)EQQSDR		CM(-251.92)CEALQQIM(251.92)EQQSDR		0	0	1	0	0	rAra_h2	rAra_h2	rAra_h2	MULTI-MSMS	20200724_QExHFX1_RSLC1_Uezuelmez_Breiteneder_ext_Uni_MFPL_rArah2_50p	1021.92	2	1021.92	2041.83	30747.9	-0.85777	-0.00087657	0.20628	0.00021081	-0.65148	-0.00066577	1021.92	23.657	0.31192	23.657	23.465	23.777	3.5527e-15					48	8	7	0	0	0	6.0142e-26	1	6798
CMCEALQQIMEQQSDR		16	Oxidation (M)	_CMCEALQQIM(ox)EQQSDR_	CMCEALQQIM(1)EQQSDR		CM(-248.86)CEALQQIM(248.86)EQQSDR		0	0	1	0	0	rAra_h2	rAra_h2	rAra_h2	MULTI-MSMS	20200724_QExHFX1_RSLC1_Uezuelmez_Breiteneder_ext_Uni_MFPL_rArah2_50p	1022.42	2	1021.92	2041.83	30797.3	-0.86471	-0.00088367	-0.078168	-7.9882e-05	-0.94288	-0.00096355	1021.92	23.913	0.75272	23.913	23.777	24.529	0					114	22	7	0	0	0	1.1146e-34	3	6850
CMCEALQQIMEQQSDR		16	Oxidation (M)	_CMCEALQQIM(ox)EQQSDR_	CMCEALQQIM(1)EQQSDR		CM(-133.94)CEALQQIM(133.94)EQQSDR		0	0	1	0	0	rAra_h2	rAra_h2	rAra_h2	MULTI-MSMS	20200724_QExHFX1_RSLC1_Uezuelmez_Breiteneder_ext_Uni_MFPL_rArah2_50p	681.953	3	681.618	2041.83	37379.6	-0.15586	-0.00010624	-0.68726	-0.00046845	-0.84312	-0.00057468	681.618	23.924	1.4725	23.924	23.743	25.216	0					210	45	7	0	0	0	1.3766e-08	5	6985
CMCEALQQIMEQQSDR		16	Oxidation (M)	_CM(ox)CEALQQIMEQQSDR_	CM(1)CEALQQIMEQQSDR		CM(175.6)CEALQQIM(-175.6)EQQSDR		0	0	1	0	0	rAra_h2	rAra_h2	rAra_h2	MULTI-MSMS	20200724_QExHFX1_RSLC1_Uezuelmez_Breiteneder_ext_Uni_MFPL_rArah2_50p	681.953	3	681.618	2041.83	37679.8	-0.24406	-0.00016636	-0.64806	-0.00044173	-0.89212	-0.00060808	681.953	25.502	1.9302	25.502	25.118	27.048	0					274	57	7	0	0	0	1.2784e-17	8	7428
CMCEALQQIMEQQSDR		16	Oxidation (M)	_CM(ox)CEALQQIMEQQSDR_	CM(1)CEALQQIMEQQSDR		CM(285.08)CEALQQIM(-285.08)EQQSDR		0	0	1	0	0	rAra_h2	rAra_h2	rAra_h2	MULTI-MSMS	20200724_QExHFX1_RSLC1_Uezuelmez_Breiteneder_ext_Uni_MFPL_rArah2_50p	1022.42	2	1021.92	2041.83	30786.9	-0.95606	-0.00097702	-0.33207	-0.00033935	-1.2881	-0.0013164	1021.92	25.501	1.3296	25.501	25.311	26.641	-3.5527e-15					172	39	7	0	0	0	1.196e-35	4	7356
CMCEALQQIMEQQSDR		16	Oxidation (M)	_CM(ox)CEALQQIMEQQSDR_	CM(0.867)CEALQQIM(0.133)EQQSDR		CM(8.15)CEALQQIM(-8.15)EQQSDR		0	0	1	0	0	rAra_h2	rAra_h2	rAra_h2	MULTI-MSMS	20200724_QExHFX1_RSLC1_Uezuelmez_Breiteneder_ext_Uni_MFPL_rArah2_50p	681.615	3	681.618	2041.83	35599.3	-0.23712	-0.00016162	0.003982	2.7142e-06	-0.23314	-0.00015891	681.953	29.027	0.69192	29.027	28.88	29.572	0					75	19	6	0	0	0	0.0001401	2	8270
CMCEALQQIMEQQSDR		16	Oxidation (M)	_CMCEALQQIM(ox)EQQSDR_	CMCEALQQIM(1)EQQSDR		CM(-36.5)CEALQQIM(36.5)EQQSDR		0	0	1	0	0	rAra_h2	rAra_h2	rAra_h2	MULTI-SECPEP	20200724_QExHFX1_RSLC1_Uezuelmez_Breiteneder_ext_Uni_MFPL_rArah2_50p	681.256	3	681.618	2041.83	44114.5	-0.22725	-0.0001549	-3.9398	-0.0026854	-4.167	-0.0028403	681.949	29.768	0.14315	29.768	29.641	29.784	0					5	3	2	0	0	0	0.019945	1	8468
CMCEALQQIMEQQSDR		16	Unmodified	_CMCEALQQIMEQQSDR_					0	0	0	0	0	rAra_h2	rAra_h2	rAra_h2	MULTI-MSMS	20200724_QExHFX1_RSLC1_Uezuelmez_Breiteneder_ext_Uni_MFPL_rArah2_50p	676.621	3	676.286	2025.84	37836.7	-0.33346	-0.00022552	-0.39997	-0.00027049	-0.73343	-0.00049601	676.621	29.03	0.90426	29.03	28.847	29.751	0					104	25	7	0	0	0	5.5921e-12	2	8265
CMCEALQQIMEQQSDR		16	Unmodified	_CMCEALQQIMEQQSDR_					0	0	0	0	0	rAra_h2	rAra_h2	rAra_h2	MULTI-MSMS	20200724_QExHFX1_RSLC1_Uezuelmez_Breiteneder_ext_Uni_MFPL_rArah2_50p	1014.43	2	1013.93	2025.84	31219.5	-0.9486	-0.00096181	0.082464	8.3613e-05	-0.86614	-0.0008782	1013.93	29.031	0.54655	29.031	28.88	29.426	0					65	15	6	0	0	0	1.0753e-17	1	8275
CMCEALQQIMEQQSDR		16	Unmodified	_CMCEALQQIMEQQSDR_					0	0	0	0	0	rAra_h2	rAra_h2	rAra_h2	MULTI-SECPEP	20200724_QExHFX1_RSLC1_Uezuelmez_Breiteneder_ext_Uni_MFPL_rArah2_50p	675.68	3	676.286	2025.84	37822.9	-0.32625	-0.00022064	0.48641	0.00032895	0.16016	0.00010832	676.286	29.613	0.24769	29.613	29.537	29.784	0					7	6	2	0	0	0	0.051389	1	8444
CQSQLER		7	Unmodified	_CQSQLER_					0	0	0	0	0	rAra_h2	rAra_h2	rAra_h2	MSMS	20200724_QExHFX1_RSLC1_Uezuelmez_Breiteneder_ext_Uni_MFPL_rArah2_50p	460.716	2	460.716	919.418	NaN	NaN	NaN	NaN	NaN	NaN	NaN	NaN	10.536	1	10.536	10.036	11.036	0								0	0	0	0.003388	1	2595
DEDSYGRDPYSPSQDPYSPSQDPDR		25	2 Oxidation (P)	_DEDSYGRDPYSP(ox)SQDPYSP(ox)SQDPDR_		DEDSYGRDPYSP(1)SQDPYSP(0.993)SQDP(0.007)DR		DEDSYGRDP(-50.93)YSP(50.93)SQDP(-70.68)YSP(21.25)SQDP(-21.25)DR	0	0	0	2	1	rAra_h2	rAra_h2	rAra_h2	MULTI-MSMS	20200724_QExHFX1_RSLC1_Uezuelmez_Breiteneder_ext_Uni_MFPL_rArah2_50p	969.395	3	969.06	2904.16	31802.9	-0.41975	-0.00040677	0.28447	0.00027567	-0.13528	-0.0001311	969.395	18.665	0.42789	18.665	18.495	18.922	0					71	17	6	0	0	0	1.4953e-19	2	5234
DEDSYGRDPYSPSQDPYSPSQDPDR		25	Unmodified	_DEDSYGRDPYSPSQDPYSPSQDPDR_					0	0	0	0	1	rAra_h2	rAra_h2	rAra_h2	MULTI-MSMS	20200724_QExHFX1_RSLC1_Uezuelmez_Breiteneder_ext_Uni_MFPL_rArah2_50p	958.731	3	958.397	2872.17	31703.9	-0.36939	-0.00035402	-0.16265	-0.00015588	-0.53204	-0.0005099	958.731	20.684	1.6727	20.684	20.383	22.056	0					298	57	8	0	0	0	4.9232e-15	4	5959
DEDSYGRDPYSPSQDPYSPSQDPDR		25	Unmodified	_DEDSYGRDPYSPSQDPYSPSQDPDR_					0	0	0	0	1	rAra_h2	rAra_h2	rAra_h2	MULTI-MSMS	20200724_QExHFX1_RSLC1_Uezuelmez_Breiteneder_ext_Uni_MFPL_rArah2_50p	1437.59	2	1437.09	2872.17	26113.8	-0.46736	-0.00067164	0.35392	0.00050861	-0.11345	-0.00016303	1437.59	20.659	0.32341	20.659	20.518	20.841	0					40	12	4	0	0	0	1.2601e-26	1	5955
DEDSYGRDPYSPSQDPYSPSQDPDRR		26	2 Oxidation (P)	_DEDSYGRDPYSP(ox)SQDPYSP(ox)SQDPDRR_		DEDSYGRDPYSP(1)SQDPYSP(0.999)SQDP(0.001)DRR		DEDSYGRDP(-33.81)YSP(33.81)SQDP(-57.28)YSP(28.49)SQDP(-28.49)DRR	0	0	0	2	2	rAra_h2	rAra_h2	rAra_h2	MULTI-MSMS	20200724_QExHFX1_RSLC1_Uezuelmez_Breiteneder_ext_Uni_MFPL_rArah2_50p	1021.43	3	1021.09	3060.26	30583.7	-0.42667	-0.00043567	-0.072598	-7.413e-05	-0.49927	-0.0005098	1021.43	16.85	1.5095	16.85	16.031	17.541	0					276	58	8	0	0	0	3.9525e-13	5	4627
DEDSYGRDPYSPSQDPYSPSQDPDRR		26	2 Oxidation (P)	_DEDSYGRDP(ox)YSPSQDP(ox)YSPSQDPDRR_		DEDSYGRDP(0.581)YSP(0.422)SQDP(0.902)YSP(0.095)SQDPDRR		DEDSYGRDP(1.66)YSP(-1.66)SQDP(10.2)YSP(-10.2)SQDP(-33.36)DRR	0	0	0	2	2	rAra_h2	rAra_h2	rAra_h2	MULTI-MSMS	20200724_QExHFX1_RSLC1_Uezuelmez_Breiteneder_ext_Uni_MFPL_rArah2_50p	1021.43	3	1021.09	3060.26	31104.4	0.022474	2.2948e-05	-0.923	-0.00094247	-0.90053	-0.00091952	1021.43	17.871	0.63838	17.871	17.447	18.085	0					94	21	5	0	0	0	0.00014382	1	4874
DEDSYGRDPYSPSQDPYSPSQDPDRR		26	2 Oxidation (P)	_DEDSYGRDP(ox)YSP(ox)SQDPYSPSQDPDRR_		DEDSYGRDP(0.862)YSP(0.807)SQDP(0.319)YSP(0.012)SQDP(0.001)DRR		DEDSYGRDP(7.12)YSP(5.62)SQDP(-5.62)YSP(-21.61)SQDP(-36.73)DRR	0	0	0	2	2	rAra_h2	rAra_h2	rAra_h2	MULTI-MSMS	20200724_QExHFX1_RSLC1_Uezuelmez_Breiteneder_ext_Uni_MFPL_rArah2_50p	1021.43	3	1021.09	3060.26	31810	-0.42163	-0.00043052	-1.3139	-0.0013417	-1.7356	-0.0017722	1021.43	18.731	0.46388	18.731	18.396	18.86	0					53	18	4	0	0	0	0.019954	1	5250
DEDSYGRDPYSPSQDPYSPSQDPDRR		26	2 Oxidation (P)	_DEDSYGRDP(ox)YSP(ox)SQDPYSPSQDPDRR_		DEDSYGRDP(0.91)YSP(0.998)SQDP(0.09)YSP(0.002)SQDPDRR		DEDSYGRDP(10.13)YSP(28)SQDP(-10.13)YSP(-27.2)SQDP(-39.21)DRR	0	0	0	2	2	rAra_h2	rAra_h2	rAra_h2	MULTI-MSMS	20200724_QExHFX1_RSLC1_Uezuelmez_Breiteneder_ext_Uni_MFPL_rArah2_50p	766.323	4	766.072	3060.26	36405.9	0.23209	0.00017779	-1.0952	-0.00083901	-0.86313	-0.00066122	766.322	18.704	0.5367	18.704	18.324	18.86	0					60	21	4	0	0	0	0.0014093	1	5263
DEDSYGRDPYSPSQDPYSPSQDPDRR		26	2 Oxidation (P)	_DEDSYGRDP(ox)YSP(ox)SQDPYSPSQDPDRR_		DEDSYGRDP(0.629)YSP(0.998)SQDP(0.368)YSP(0.004)SQDPDRR		DEDSYGRDP(2.35)YSP(26.89)SQDP(-2.35)YSP(-23.49)SQDP(-39.19)DRR	0	0	0	2	2	rAra_h2	rAra_h2	rAra_h2	MULTI-SECPEP	20200724_QExHFX1_RSLC1_Uezuelmez_Breiteneder_ext_Uni_MFPL_rArah2_50p	765.324	4	766.072	3060.26	35907.3	0.00086756	6.6461e-07	0.060916	4.6666e-05	0.061784	4.7331e-05	766.323	18.975	0.83425	18.975	18.836	19.67	0					54	31	2	0	0	0	0.011407	1	5420
DEDSYGRDPYSPSQDPYSPSQDPDRR		26	Oxidation (P)	_DEDSYGRDPYSP(ox)SQDPYSPSQDPDRR_		DEDSYGRDP(0.001)YSP(0.983)SQDP(0.016)YSPSQDPDRR		DEDSYGRDP(-29.41)YSP(17.86)SQDP(-17.86)YSP(-75.08)SQDP(-107.28)DRR	0	0	0	1	2	rAra_h2	rAra_h2	rAra_h2	MULTI-MSMS	20200724_QExHFX1_RSLC1_Uezuelmez_Breiteneder_ext_Uni_MFPL_rArah2_50p	1016.1	3	1015.76	3044.27	31008.2	0.021724	2.2066e-05	-0.43258	-0.0004394	-0.41086	-0.00041733	1016.1	17.825	2.5462	17.825	17.1	19.646	0					344	92	8	0	0	0	4.9091e-13	7	4870
DEDSYGRDPYSPSQDPYSPSQDPDRR		26	Unmodified	_DEDSYGRDPYSPSQDPYSPSQDPDRR_					0	0	0	0	2	rAra_h2	rAra_h2	rAra_h2	MULTI-MSMS	20200724_QExHFX1_RSLC1_Uezuelmez_Breiteneder_ext_Uni_MFPL_rArah2_50p	606.862	5	606.661	3028.27	40763.6	0.03916	2.3757e-05	0.18547	0.00011252	0.22463	0.00013628	606.863	18.678	0.31502	18.678	18.495	18.81	0					36	12	4	0	0	0	0.039935	1	5251
DPYSPSPYDR		10	2 Oxidation (P)	_DPYSP(ox)SP(ox)YDR_		DPYSP(1)SP(1)YDR		DP(-147.12)YSP(147.12)SP(158.53)YDR	0	0	0	2	0	rAra_h2	rAra_h2	rAra_h2	MULTI-MSMS	20200724_QExHFX1_RSLC1_Uezuelmez_Breiteneder_ext_Uni_MFPL_rArah2_50p	614.759	2	614.759	1227.5	40233.3	-0.84721	-0.00052083	0.77609	0.00047711	-0.071121	-4.3722e-05	614.76	15.021	1.2527	15.021	14.125	15.377	0					98	42	4	0	0	0	1.9508e-15	3	3895
DPYSPSPYDR		10	2 Oxidation (P)	_DPYSP(ox)SP(ox)YDR_		DP(0.001)YSP(1)SP(0.999)YDR		DP(-31.24)YSP(55.52)SP(31.24)YDR	0	0	0	2	0	rAra_h2	rAra_h2	rAra_h2	MULTI-MSMS	20200724_QExHFX1_RSLC1_Uezuelmez_Breiteneder_ext_Uni_MFPL_rArah2_50p	614.76	2	614.759	1227.5	39693.2	-0.10042	-6.1735e-05	0.14117	8.6787e-05	0.040751	2.5052e-05	614.759	17.13	0.85916	17.13	16.835	17.694	0					78	30	4	0	0	0	0.01364	2	4771
DPYSPSPYDR		10	2 Oxidation (P)	_DPYSP(ox)SP(ox)YDR_		DPYSP(1)SP(1)YDR		DP(-35.32)YSP(44.74)SP(35.32)YDR	0	0	0	2	0	rAra_h2	rAra_h2	rAra_h2	MULTI-MSMS	20200724_QExHFX1_RSLC1_Uezuelmez_Breiteneder_ext_Uni_MFPL_rArah2_50p	614.759	2	614.759	1227.5	40840.1	-0.053185	-3.2696e-05	0.29566	0.00018176	0.24248	0.00014907	614.76	18.332	0.5914	18.332	18.192	18.784	0					56	24	3	0	0	0	0.022258	2	5188
DPYSPSPYDR		10	Oxidation (P)	_DPYSP(ox)SPYDR_		DPYSP(1)SPYDR		DP(-124.15)YSP(75.21)SP(-75.21)YDR	0	0	0	1	0	rAra_h2	rAra_h2	rAra_h2	MULTI-MSMS	20200724_QExHFX1_RSLC1_Uezuelmez_Breiteneder_ext_Uni_MFPL_rArah2_50p	605.754	2	606.762	1211.51	39778.6	-0.03823	-2.3197e-05	-0.15062	-9.1389e-05	-0.18885	-0.00011459	606.762	16.432	2.0593	16.432	15.87	17.929	0					321	79	6	0	0	0	1.8582e-15	9	4565
DPYSPSPYDR		10	Unmodified	_DPYSPSPYDR_					0	0	0	0	0	rAra_h2	rAra_h2	rAra_h2	MULTI-MSMS	20200724_QExHFX1_RSLC1_Uezuelmez_Breiteneder_ext_Uni_MFPL_rArah2_50p	597.757	2	598.765	1195.51	40426.4	0.58748	0.00035176	-0.22059	-0.00013208	0.36689	0.00021968	598.764	18.287	2.8446	18.287	18.097	20.941	0					312	114	7	0	0	0	1.7023e-15	14	5142
DPYSPSPYDR		10	Unmodified	_DPYSPSPYDR_					0	0	0	0	0	rAra_h2	rAra_h2	rAra_h2	MSMS	20200724_QExHFX1_RSLC1_Uezuelmez_Breiteneder_ext_Uni_MFPL_rArah2_50p	598.765	2	598.765	1195.51	NaN	NaN	NaN	NaN	NaN	NaN	NaN	NaN	30.085	1	30.085	29.585	30.585	0								0	0	0	0.021308	1	8558
DPYSPSPYDR		10	Unmodified	_DPYSPSPYDR_					0	0	0	0	0	rAra_h2	rAra_h2	rAra_h2	MSMS	20200724_QExHFX1_RSLC1_Uezuelmez_Breiteneder_ext_Uni_MFPL_rArah2_50p	598.765	2	598.765	1195.51	NaN	NaN	NaN	NaN	NaN	NaN	NaN	NaN	31.471	1	31.471	30.971	31.971	0								0	0	0	0.012101	1	8912
DPYSPSPYDR		10	Unmodified	_DPYSPSPYDR_					0	0	0	0	0	rAra_h2	rAra_h2	rAra_h2	MULTI-SECPEP	20200724_QExHFX1_RSLC1_Uezuelmez_Breiteneder_ext_Uni_MFPL_rArah2_50p	598.273	2	598.765	1195.51	42286.9	-0.16816	-0.00010069	0.98374	0.00058903	0.81559	0.00048834	598.765	26.82	0.71845	26.82	26.362	27.08	3.5527e-15					30	20	2	0	0	0	0.028875	1	7559
DPYSPSPYDRR		11	2 Oxidation (P)	_DPYSP(ox)SP(ox)YDRR_		DPYSP(1)SP(1)YDRR		DP(-130.75)YSP(130.75)SP(130.75)YDRR	0	0	0	2	1	rAra_h2	rAra_h2	rAra_h2	MULTI-MSMS	20200724_QExHFX1_RSLC1_Uezuelmez_Breiteneder_ext_Uni_MFPL_rArah2_50p	692.81	2	692.81	1383.61	36394.4	-0.14555	-0.00010084	0.51188	0.00035463	0.36632	0.00025379	692.81	12.823	1.5303	12.823	11.999	13.529	0					128	50	5	0	0	0	2.4843e-11	4	3250
DPYSPSPYDRR		11	2 Oxidation (P)	_DPYSP(ox)SP(ox)YDRR_		DPYSP(1)SP(1)YDRR		DP(-79.4)YSP(79.4)SP(114.62)YDRR	0	0	0	2	1	rAra_h2	rAra_h2	rAra_h2	MULTI-MSMS	20200724_QExHFX1_RSLC1_Uezuelmez_Breiteneder_ext_Uni_MFPL_rArah2_50p	462.209	3	462.209	1383.61	45860.5	-0.28839	-0.0001333	0.024304	1.1233e-05	-0.26408	-0.00012206	462.209	12.84	1.4083	12.84	12.089	13.498	0					116	46	4	0	0	0	1.576e-07	3	3224
DPYSPSPYDRR		11	Oxidation (P)	_DPYSP(ox)SPYDRR_		DPYSP(0.991)SP(0.009)YDRR		DP(-107.6)YSP(20.65)SP(-20.65)YDRR	0	0	0	1	1	rAra_h2	rAra_h2	rAra_h2	MULTI-MSMS	20200724_QExHFX1_RSLC1_Uezuelmez_Breiteneder_ext_Uni_MFPL_rArah2_50p	684.812	2	684.813	1367.61	37094	-0.44657	-0.00030582	0.2743	0.00018784	-0.17227	-0.00011798	684.813	13.343	0.93795	13.343	12.622	13.56	-1.7764e-15					88	31	6	0	0	0	1.4266e-10	1	3476
DPYSPSPYDRR		11	Oxidation (P)	_DPYSP(ox)SPYDRR_		DPYSP(1)SPYDRR		DP(-107.57)YSP(103.21)SP(-103.21)YDRR	0	0	0	1	1	rAra_h2	rAra_h2	rAra_h2	MULTI-MSMS	20200724_QExHFX1_RSLC1_Uezuelmez_Breiteneder_ext_Uni_MFPL_rArah2_50p	456.877	3	456.877	1367.61	46194	-0.29978	-0.00013696	-0.02399	-1.096e-05	-0.32377	-0.00014792	456.877	13.818	2.2885	13.818	13.047	15.335	0					298	80	6	0	0	0	9.3077e-16	8	3682
DPYSPSPYDRR		11	Unmodified	_DPYSPSPYDRR_					0	0	0	0	1	rAra_h2	rAra_h2	rAra_h2	MULTI-MSMS	20200724_QExHFX1_RSLC1_Uezuelmez_Breiteneder_ext_Uni_MFPL_rArah2_50p	1352.62	1	1352.62	1351.62	26883.1	-1.5223	-0.0020592	0.52559	0.00071093	-0.99675	-0.0013482	1352.62	15.359	0.25043	15.359	15.24	15.491	0					21	10	3	0	0	0	4.6658e-07	1	4044
DPYSPSPYDRR		11	Unmodified	_DPYSPSPYDRR_					0	0	0	0	1	rAra_h2	rAra_h2	rAra_h2	MULTI-MSMS	20200724_QExHFX1_RSLC1_Uezuelmez_Breiteneder_ext_Uni_MFPL_rArah2_50p	676.814	2	676.815	1351.62	37790.5	-0.77282	-0.00052306	-0.19211	-0.00013003	-0.96493	-0.00065308	676.815	15.358	3.0557	15.358	14.873	17.929	0					368	119	6	0	0	0	4.4305e-22	10	4051
DPYSPSPYDRR		11	Unmodified	_DPYSPSPYDRR_					0	0	0	0	1	rAra_h2	rAra_h2	rAra_h2	MULTI-MSMS	20200724_QExHFX1_RSLC1_Uezuelmez_Breiteneder_ext_Uni_MFPL_rArah2_50p	451.546	3	451.546	1351.62	46097.4	-0.74826	-0.00033788	0.16245	7.3353e-05	-0.58581	-0.00026452	451.546	15.362	3.0974	15.362	14.873	17.971	1.7764e-15					390	121	6	0	0	0	9.1446e-17	9	4206
DPYSPSPYDRR		11	Unmodified	_DPYSPSPYDRR_					0	0	0	0	1	rAra_h2	rAra_h2	rAra_h2	MULTI-MSMS	20200724_QExHFX1_RSLC1_Uezuelmez_Breiteneder_ext_Uni_MFPL_rArah2_50p	451.546	3	451.546	1351.62	48060.3	-0.2583	-0.00011663	0.19275	8.7034e-05	-0.065553	-2.96e-05	451.546	31.389	1.7084	31.389	30.068	31.777	0					68	48	2	0	0	0	0.029317	2	8971
DPYSPSPYDRR		11	Unmodified	_DPYSPSPYDRR_					0	0	0	0	1	rAra_h2	rAra_h2	rAra_h2	MULTI-MSMS	20200724_QExHFX1_RSLC1_Uezuelmez_Breiteneder_ext_Uni_MFPL_rArah2_50p	451.546	3	451.546	1351.62	48090.3	0.008752	3.9519e-06	-0.51834	-0.00023406	-0.50959	-0.0002301	451.546	44.258	0.35646	44.258	44.041	44.398	0					77	37	3	0	0	0	0.045681	1	12581
DPYSPSPYDRR		11	Unmodified	_DPYSPSPYDRR_					0	0	0	0	1	rAra_h2	rAra_h2	rAra_h2	MSMS	20200724_QExHFX1_RSLC1_Uezuelmez_Breiteneder_ext_Uni_MFPL_rArah2_50p	451.546	3	451.546	1351.62	NaN	NaN	NaN	NaN	NaN	NaN	NaN	NaN	29.935	1	29.935	29.435	30.435	0								0	0	0	0.018235	1	8520
DPYSPSPYDRR		11	Unmodified	_DPYSPSPYDRR_					0	0	0	0	1	rAra_h2	rAra_h2	rAra_h2	MSMS	20200724_QExHFX1_RSLC1_Uezuelmez_Breiteneder_ext_Uni_MFPL_rArah2_50p	451.545	3	451.546	1351.62	NaN	NaN	NaN	NaN	NaN	NaN	NaN	NaN	32.156	1	32.156	31.656	32.656	0								0	0	0	0.051038	1	9104
DPYSPSPYDRR		11	Unmodified	_DPYSPSPYDRR_					0	0	0	0	1	rAra_h2	rAra_h2	rAra_h2	MSMS	20200724_QExHFX1_RSLC1_Uezuelmez_Breiteneder_ext_Uni_MFPL_rArah2_50p	451.546	3	451.546	1351.62	NaN	NaN	NaN	NaN	NaN	NaN	NaN	NaN	43.064	1	43.064	42.564	43.564	0								0	0	0	0.051906	1	12244
DPYSPSPYDRR		11	Unmodified	_DPYSPSPYDRR_					0	0	0	0	1	rAra_h2	rAra_h2	rAra_h2	MSMS	20200724_QExHFX1_RSLC1_Uezuelmez_Breiteneder_ext_Uni_MFPL_rArah2_50p	451.546	3	451.546	1351.62	NaN	NaN	NaN	NaN	NaN	NaN	NaN	NaN	44.016	1	44.016	43.516	44.516	0								0	0	0	0.051558	1	12493
DPYSPSPYDRR		11	Unmodified	_DPYSPSPYDRR_					0	0	0	0	1	rAra_h2	rAra_h2	rAra_h2	MULTI-SECPEP	20200724_QExHFX1_RSLC1_Uezuelmez_Breiteneder_ext_Uni_MFPL_rArah2_50p	676.972	2	676.815	1351.62	38437.3	-0.094289	-6.3816e-05	0.15956	0.00010799	0.065269	4.4175e-05	676.816	19.162	0.74837	19.162	18.898	19.646	0					47	27	3	0	0	0	0.010402	1	5441
DPYSPSPYDRRGAGSSQHQER		21	Unmodified	_DPYSPSPYDRRGAGSSQHQER_					0	0	0	0	2	rAra_h2	rAra_h2	rAra_h2	MULTI-MSMS	20200724_QExHFX1_RSLC1_Uezuelmez_Breiteneder_ext_Uni_MFPL_rArah2_50p	797.702	3	797.367	2389.08	35075.8	-0.48131	-0.00038378	0.64646	0.00051547	0.16515	0.00013168	797.702	12.239	0.43158	12.239	12.089	12.521	-1.7764e-15					38	13	4	0	0	0	0.00036682	1	3100
DPYSPSQDPYSPSQDPDR		18	2 Oxidation (P)	_DPYSP(ox)SQDPYSP(ox)SQDPDR_		DPYSP(1)SQDPYSP(1)SQDPDR		DP(-94.83)YSP(94.83)SQDP(-56.72)YSP(36.29)SQDP(-36.29)DR	0	0	0	2	0	rAra_h2	rAra_h2	rAra_h2	MULTI-MSMS	20200724_QExHFX1_RSLC1_Uezuelmez_Breiteneder_ext_Uni_MFPL_rArah2_50p	1042.43	2	1041.93	2081.85	30788.4	-0.034433	-3.5877e-05	0.13473	0.00014038	0.1003	0.00010451	1042.43	17.657	0.45476	17.657	17.447	17.901	0					56	15	5	0	0	0	4.2873e-46	2	4854
DPYSPSQDPYSPSQDPDR		18	2 Oxidation (P)	_DPYSP(ox)SQDPYSP(ox)SQDPDR_		DP(0.38)YSP(0.62)SQDPYSP(0.995)SQDP(0.005)DR		DP(-2.12)YSP(2.12)SQDP(-34.8)YSP(22.18)SQDP(-22.18)DR	0	0	0	2	0	rAra_h2	rAra_h2	rAra_h2	MULTI-MSMS	20200724_QExHFX1_RSLC1_Uezuelmez_Breiteneder_ext_Uni_MFPL_rArah2_50p	694.956	3	694.956	2081.85	38424	0.82123	0.00057072	-0.090897	-6.317e-05	0.73033	0.00050755	694.956	17.629	0.3767	17.629	17.476	17.853	0					34	12	4	0	0	0	0.00075307	1	4882
DPYSPSQDPYSPSQDPDR		18	Oxidation (P)	_DPYSP(ox)SQDPYSPSQDPDR_		DP(0.002)YSP(0.76)SQDP(0.23)YSP(0.008)SQDPDR		DP(-26.07)YSP(5.19)SQDP(-5.19)YSP(-19.97)SQDP(-57.82)DR	0	0	0	1	0	rAra_h2	rAra_h2	rAra_h2	MULTI-MSMS	20200724_QExHFX1_RSLC1_Uezuelmez_Breiteneder_ext_Uni_MFPL_rArah2_50p	689.959	3	689.624	2065.85	37573.4	0.20423	0.00014085	0.48062	0.00033144	0.68485	0.00047229	689.959	19.125	0.72364	19.125	18.922	19.646	0					93	26	5	0	0	0	8.4363e-05	2	5399
DPYSPSQDPYSPSQDPDR		18	Unmodified	_DPYSPSQDPYSPSQDPDR_					0	0	0	0	0	rAra_h2	rAra_h2	rAra_h2	MULTI-MSMS	20200724_QExHFX1_RSLC1_Uezuelmez_Breiteneder_ext_Uni_MFPL_rArah2_50p	1026.44	2	1025.93	2049.86	30961.5	-0.52583	-0.00053947	0.10311	0.00010578	-0.42272	-0.00043369	1026.44	20.466	1.2651	20.466	20.207	21.472	0					190	46	7	0	0	0	2.0105e-46	3	5887
DPYSPSQDPYSPSQDPDRR		19	2 Oxidation (P)	_DPYSP(ox)SQDPYSP(ox)SQDPDRR_		DPYSP(1)SQDPYSP(0.991)SQDP(0.009)DRR		DP(-108.98)YSP(63.51)SQDP(-49.09)YSP(20.47)SQDP(-20.47)DRR	0	0	0	2	1	rAra_h2	rAra_h2	rAra_h2	MULTI-MSMS	20200724_QExHFX1_RSLC1_Uezuelmez_Breiteneder_ext_Uni_MFPL_rArah2_50p	747.324	3	746.989	2237.95	36405.7	-0.72237	-0.0005396	0.17044	0.00012732	-0.55193	-0.00041228	747.324	15.393	0.89818	15.393	15.046	15.944	-1.7764e-15					106	36	5	0	0	0	4.0015e-18	2	4021
DPYSPSQDPYSPSQDPDRR		19	2 Oxidation (P)	_DPYSP(ox)SQDPYSP(ox)SQDPDRR_		DPYSP(1)SQDPYSP(1)SQDPDRR		DP(-63.88)YSP(53.15)SQDP(-47.88)YSP(44.13)SQDP(-44.13)DRR	0	0	0	2	1	rAra_h2	rAra_h2	rAra_h2	MULTI-MSMS	20200724_QExHFX1_RSLC1_Uezuelmez_Breiteneder_ext_Uni_MFPL_rArah2_50p	1120.48	2	1119.98	2237.95	30950	-1.4581	-0.0016331	-0.086449	-9.6822e-05	-1.5446	-0.0017299	1120.48	15.387	0.31944	15.387	15.211	15.53	1.7764e-15					22	13	2	0	0	0	7.5998e-18	1	4040
DPYSPSQDPYSPSQDPDRR		19	Oxidation (P)	_DPYSPSQDPYSP(ox)SQDPDRR_		DPYSPSQDP(0.004)YSP(0.996)SQDPDRR		DP(-159.58)YSP(-60.47)SQDP(-24.5)YSP(24.5)SQDP(-82.86)DRR	0	0	0	1	1	rAra_h2	rAra_h2	rAra_h2	MULTI-MSMS	20200724_QExHFX1_RSLC1_Uezuelmez_Breiteneder_ext_Uni_MFPL_rArah2_50p	1112.48	2	1111.98	2221.95	29596.3	-0.47696	-0.00053037	0.24163	0.00026869	-0.23533	-0.00026169	1112.48	16.689	0.69645	16.689	16.479	17.176	0					99	27	5	0	0	0	3.7092e-27	2	4586
DPYSPSQDPYSPSQDPDRR		19	Unmodified	_DPYSPSQDPYSPSQDPDRR_					0	0	0	0	1	rAra_h2	rAra_h2	rAra_h2	MULTI-MSMS	20200724_QExHFX1_RSLC1_Uezuelmez_Breiteneder_ext_Uni_MFPL_rArah2_50p	1104.49	2	1103.99	2205.96	29714.6	0.019129	2.1118e-05	-0.17321	-0.00019122	-0.15408	-0.0001701	1104.49	17.832	0.76036	17.832	17.541	18.301	0					122	33	6	0	0	0	1.1184e-34	3	4890
DPYSPSQDPYSPSQDPDRR		19	Unmodified	_DPYSPSQDPYSPSQDPDRR_					0	0	0	0	1	rAra_h2	rAra_h2	rAra_h2	MULTI-SECPEP	20200724_QExHFX1_RSLC1_Uezuelmez_Breiteneder_ext_Uni_MFPL_rArah2_50p	736.863	3	736.326	2205.96	36788.6	-0.075701	-5.5741e-05	0.36042	0.00026539	0.28472	0.00020965	736.326	19.298	1.1998	19.298	18.922	20.122	0					73	44	2	0	0	0	0.022795	1	5489
IQRDEDSYGR		10	Unmodified	_IQRDEDSYGR_					0	0	0	0	1	rAra_h2	rAra_h2	rAra_h2	MULTI-MSMS	20200724_QExHFX1_RSLC1_Uezuelmez_Breiteneder_ext_Uni_MFPL_rArah2_50p	619.792	2	619.792	1237.57	40400.6	-0.40479	-0.00025089	0.79071	0.00049007	0.38591	0.00023919	620.294	10.392	0.2611	10.392	10.266	10.528	0					8	6	2	0	0	0	0.029126	1	2551
IQRDEDSYGR		10	Unmodified	_IQRDEDSYGR_					0	0	0	0	1	rAra_h2	rAra_h2	rAra_h2	MULTI-MSMS	20200724_QExHFX1_RSLC1_Uezuelmez_Breiteneder_ext_Uni_MFPL_rArah2_50p	413.53	3	413.53	1237.57	47931.9	-0.19871	-8.2173e-05	0.10494	4.3395e-05	-0.093772	-3.8778e-05	413.53	10.723	0.73329	10.723	10.528	11.261	0					63	20	5	0	0	0	1.2603e-07	3	2671
IQRDEDSYGR		10	Unmodified	_IQRDEDSYGR_					0	0	0	0	1	rAra_h2	rAra_h2	rAra_h2	MULTI-SECPEP	20200724_QExHFX1_RSLC1_Uezuelmez_Breiteneder_ext_Uni_MFPL_rArah2_50p	413.53	3	413.53	1237.57	54772.3	-0.17044	-7.0481e-05	0.070329	2.9083e-05	-0.10011	-4.1397e-05	413.53	10.393	0.2611	10.393	10.266	10.528	0					7	6	2	0	0	0	0.045921	1	2559
IQRDEDSYGRDPYSPSQDPYSPSQDPDR		28	2 Oxidation (P)	_IQRDEDSYGRDPYSP(ox)SQDPYSP(ox)SQDPDR_		IQRDEDSYGRDPYSP(1)SQDPYSP(0.974)SQDP(0.026)DR		IQRDEDSYGRDP(-35.01)YSP(35.01)SQDP(-58.96)YSP(15.75)SQDP(-15.75)DR	0	0	0	2	2	rAra_h2	rAra_h2	rAra_h2	MULTI-MSMS	20200724_QExHFX1_RSLC1_Uezuelmez_Breiteneder_ext_Uni_MFPL_rArah2_50p	826.608	4	826.358	3301.4	34909.8	-0.26463	-0.00021868	0.17674	0.00014605	-0.087888	-7.2627e-05	826.609	16.507	0.36129	16.507	16.407	16.768	0					47	13	5	0	0	0	5.5231e-09	1	4498
IQRDEDSYGRDPYSPSQDPYSPSQDPDR		28	Oxidation (P)	_IQRDEDSYGRDPYSP(ox)SQDPYSPSQDPDR_		IQRDEDSYGRDP(0.004)YSP(0.766)SQDP(0.196)YSP(0.034)SQDPDR		IQRDEDSYGRDP(-22.73)YSP(5.93)SQDP(-5.93)YSP(-13.53)SQDP(-35.71)DR	0	0	0	1	2	rAra_h2	rAra_h2	rAra_h2	MULTI-MSMS	20200724_QExHFX1_RSLC1_Uezuelmez_Breiteneder_ext_Uni_MFPL_rArah2_50p	822.611	4	822.359	3285.41	34510.8	0.041152	3.3842e-05	0.2214	0.00018207	0.26255	0.00021591	822.61	17.343	0.62548	17.343	17.126	17.751	0					78	20	6	0	0	0	7.7165e-05	1	4768
IQRDEDSYGRDPYSPSQDPYSPSQDPDR		28	Oxidation (P)	_IQRDEDSYGRDPYSPSQDPYSP(ox)SQDPDR_		IQRDEDSYGRDP(0.004)YSP(0.021)SQDP(0.29)YSP(0.682)SQDP(0.003)DR		IQRDEDSYGRDP(-21.83)YSP(-15.11)SQDP(-3.71)YSP(3.71)SQDP(-23.48)DR	0	0	0	1	2	rAra_h2	rAra_h2	rAra_h2	MULTI-MSMS	20200724_QExHFX1_RSLC1_Uezuelmez_Breiteneder_ext_Uni_MFPL_rArah2_50p	1096.48	3	1096.14	3285.41	30164	-0.23092	-0.00025312	0.49233	0.00053966	0.26141	0.00028654	1096.48	17.37	0.50622	17.37	17.126	17.632	3.5527e-15					67	16	6	0	0	0	2.143e-05	1	4776
IQRDEDSYGRDPYSPSQDPYSPSQDPDRR		29	2 Oxidation (P)	_IQRDEDSYGRDPYSP(ox)SQDPYSP(ox)SQDPDRR_		IQRDEDSYGRDPYSP(1)SQDPYSP(0.993)SQDP(0.007)DRR		IQRDEDSYGRDP(-36.55)YSP(36.55)SQDP(-42.76)YSP(21.82)SQDP(-21.82)DRR	0	0	0	2	3	rAra_h2	rAra_h2	rAra_h2	MULTI-MSMS	20200724_QExHFX1_RSLC1_Uezuelmez_Breiteneder_ext_Uni_MFPL_rArah2_50p	865.633	4	865.383	3457.5	34104.3	-1.3833	-0.0011971	0.33859	0.00029301	-1.0447	-0.00090409	865.635	15.343	1.388	15.343	14.903	16.291	1.7764e-15					142	56	7	0	0	0	5.7949e-14	3	4069
IQRDEDSYGRDPYSPSQDPYSPSQDPDRR		29	2 Oxidation (P)	_IQRDEDSYGRDPYSP(ox)SQDPYSP(ox)SQDPDRR_		IQRDEDSYGRDP(0.002)YSP(0.998)SQDP(0.393)YSP(0.607)SQDPDRR		IQRDEDSYGRDP(-26.58)YSP(26.58)SQDP(-1.89)YSP(1.89)SQDP(-34.07)DRR	0	0	0	2	3	rAra_h2	rAra_h2	rAra_h2	MULTI-MSMS	20200724_QExHFX1_RSLC1_Uezuelmez_Breiteneder_ext_Uni_MFPL_rArah2_50p	1154.18	3	1153.51	3457.5	29492.1	-1.4624	-0.0016869	0.088664	0.00010227	-1.3737	-0.0015846	1154.18	15.362	0.5324	15.362	15.018	15.55	0					73	21	6	0	0	0	4.5135e-14	2	4078
IQRDEDSYGRDPYSPSQDPYSPSQDPDRR		29	2 Oxidation (P)	_IQRDEDSYGRDPYSP(ox)SQDPYSP(ox)SQDPDRR_		IQRDEDSYGRDPYSP(1)SQDPYSP(0.993)SQDP(0.006)DRR		IQRDEDSYGRDP(-63.11)YSP(63.11)SQDP(-35.54)YSP(22)SQDP(-22)DRR	0	0	0	2	3	rAra_h2	rAra_h2	rAra_h2	MULTI-MSMS	20200724_QExHFX1_RSLC1_Uezuelmez_Breiteneder_ext_Uni_MFPL_rArah2_50p	692.708	5	692.508	3457.5	37411.3	-0.56752	-0.00039301	-0.34438	-0.00023849	-0.9119	-0.0006315	692.708	15.368	0.4562	15.368	15.074	15.53	0					67	18	5	0	0	0	5.9664e-14	1	4020
IQRDEDSYGRDPYSPSQDPYSPSQDPDRR		29	Oxidation (P)	_IQRDEDSYGRDPYSPSQDPYSP(ox)SQDPDRR_		IQRDEDSYGRDPYSP(0.001)SQDP(0.31)YSP(0.689)SQDPDRR		IQRDEDSYGRDP(-36.02)YSP(-28.83)SQDP(-3.47)YSP(3.47)SQDP(-33.03)DRR	0	0	0	1	3	rAra_h2	rAra_h2	rAra_h2	MULTI-MSMS	20200724_QExHFX1_RSLC1_Uezuelmez_Breiteneder_ext_Uni_MFPL_rArah2_50p	1148.51	3	1148.18	3441.51	29076.4	-0.64077	-0.00073572	0.34596	0.00039723	-0.29481	-0.00033849	1148.51	16.133	1.0329	16.133	15.92	16.953	0					196	42	8	0	0	0	8.7186e-14	3	4376
IQRDEDSYGRDPYSPSQDPYSPSQDPDRR		29	Oxidation (P)	_IQRDEDSYGRDPYSP(ox)SQDPYSPSQDPDRR_		IQRDEDSYGRDP(0.001)YSP(0.985)SQDP(0.007)YSP(0.007)SQDP(0.001)DRR		IQRDEDSYGRDP(-29.57)YSP(21.74)SQDP(-21.74)YSP(-21.74)SQDP(-29.77)DRR	0	0	0	1	3	rAra_h2	rAra_h2	rAra_h2	MULTI-MSMS	20200724_QExHFX1_RSLC1_Uezuelmez_Breiteneder_ext_Uni_MFPL_rArah2_50p	689.509	5	689.309	3441.51	37311.7	0.22964	0.00015829	-0.24475	-0.00016871	-0.015111	-1.0416e-05	689.509	16.139	1.1357	16.139	15.818	16.953	0					181	46	7	0	0	0	6.5116e-09	3	4316
IQRDEDSYGRDPYSPSQDPYSPSQDPDRR		29	Unmodified	_IQRDEDSYGRDPYSPSQDPYSPSQDPDRR_					0	0	0	0	3	rAra_h2	rAra_h2	rAra_h2	MULTI-MSMS	20200724_QExHFX1_RSLC1_Uezuelmez_Breiteneder_ext_Uni_MFPL_rArah2_50p	857.636	4	857.386	3425.51	33785.2	-0.40217	-0.00034482	-0.077133	-6.6132e-05	-0.47931	-0.00041095	857.637	16.77	1.4496	16.77	16.479	17.929	0					317	53	9	0	0	0	2.6809e-20	6	4532
IQRDEDSYGRDPYSPSQDPYSPSQDPDRR		29	Unmodified	_IQRDEDSYGRDPYSPSQDPYSPSQDPDRR_					0	0	0	0	3	rAra_h2	rAra_h2	rAra_h2	MULTI-MSMS	20200724_QExHFX1_RSLC1_Uezuelmez_Breiteneder_ext_Uni_MFPL_rArah2_50p	1143.18	3	1142.85	3425.51	29203	-0.45966	-0.00052532	0.076785	8.7754e-05	-0.38288	-0.00043757	1143.18	16.785	1.1506	16.785	16.543	17.694	0					242	42	8	0	0	0	2.9844e-20	4	4682
MRQQWELQGDR		11	Oxidation (M)	_M(ox)RQQWELQGDR_	M(1)RQQWELQGDR		M(180.19)RQQWELQGDR		0	0	1	0	1	rAra_h2	rAra_h2	rAra_h2	MULTI-MSMS	20200724_QExHFX1_RSLC1_Uezuelmez_Breiteneder_ext_Uni_MFPL_rArah2_50p	731.847	2	731.846	1461.68	35879.8	0.10121	7.4072e-05	-0.60372	-0.00044183	-0.50251	-0.00036776	731.846	16.131	0.56282	16.131	15.844	16.407	0					73	23	5	0	0	0	8.4102e-11	2	4333
MRQQWELQGDR		11	Oxidation (M)	_M(ox)RQQWELQGDR_	M(1)RQQWELQGDR		M(111.63)RQQWELQGDR		0	0	1	0	1	rAra_h2	rAra_h2	rAra_h2	MULTI-MSMS	20200724_QExHFX1_RSLC1_Uezuelmez_Breiteneder_ext_Uni_MFPL_rArah2_50p	488.233	3	488.233	1461.68	43976.9	0.028461	1.3896e-05	-0.20923	-0.00010215	-0.18077	-8.8256e-05	488.233	16.135	0.46243	16.135	15.968	16.431	-3.5527e-15					62	19	4	0	0	0	8.6756e-05	2	4334
MRQQWELQGDRR		12	Oxidation (M)	_M(ox)RQQWELQGDRR_	M(1)RQQWELQGDRR		M(63.22)RQQWELQGDRR		0	0	1	0	2	rAra_h2	rAra_h2	rAra_h2	MULTI-MSMS	20200724_QExHFX1_RSLC1_Uezuelmez_Breiteneder_ext_Uni_MFPL_rArah2_50p	810.398	2	809.897	1617.78	34243.4	-0.73733	-0.00059716	-0.14739	-0.00011937	-0.88472	-0.00071653	809.897	13.813	0.79149	13.813	13.678	14.469	-1.7764e-15					82	27	4	0	0	0	0.015028	1	3593
MRQQWELQGDRR		12	Oxidation (M)	_M(ox)RQQWELQGDRR_	M(1)RQQWELQGDRR		M(134.99)RQQWELQGDRR		0	0	1	0	2	rAra_h2	rAra_h2	rAra_h2	MULTI-MSMS	20200724_QExHFX1_RSLC1_Uezuelmez_Breiteneder_ext_Uni_MFPL_rArah2_50p	540.267	3	540.267	1617.78	41642	-0.40769	-0.00022026	0.18963	0.00010245	-0.21806	-0.00011781	540.267	13.815	1.2169	13.815	13.629	14.846	0					127	41	4	0	0	0	3.2998e-07	2	3630
NLPQQCGLR		9	Unmodified	_NLPQQCGLR_					0	0	0	0	0	rAra_h2	rAra_h2	rAra_h2	MULTI-MSMS	20200724_QExHFX1_RSLC1_Uezuelmez_Breiteneder_ext_Uni_MFPL_rArah2_50p	543.28	2	543.28	1084.54	40904.5	-0.726	-0.00039442	-0.34256	-0.0001861	-1.0686	-0.00058052	543.28	15.447	2.2233	15.447	15.074	17.298	0					347	90	5	0	0	0	1.6053e-05	11	4384
NLPQQCGLR		9	Unmodified	_NLPQQCGLR_					0	0	0	0	0	rAra_h2	rAra_h2	rAra_h2	MULTI-MSMS	20200724_QExHFX1_RSLC1_Uezuelmez_Breiteneder_ext_Uni_MFPL_rArah2_50p	543.28	2	543.28	1084.54	43136.8	0.57835	0.0003142	0.56573	0.00030735	1.1441	0.00062155	543.28	17.926	0.86647	17.926	17.298	18.164	0					59	34	2	0	0	0	0.0001039	4	4998
NLPQQCGLR		9	Unmodified	_NLPQQCGLR_					0	0	0	0	0	rAra_h2	rAra_h2	rAra_h2	MULTI-MSMS	20200724_QExHFX1_RSLC1_Uezuelmez_Breiteneder_ext_Uni_MFPL_rArah2_50p	543.279	2	543.28	1084.54	42347.8	-0.037371	-2.0303e-05	-0.13667	-7.4251e-05	-0.17404	-9.4554e-05	543.28	42.477	8.0836	42.477	41.919	50.003	0					3145	1294	3	0	0	0	0.00066482	47	12609
NLPQQCGLR		9	Unmodified	_NLPQQCGLR_					0	0	0	0	0	rAra_h2	rAra_h2	rAra_h2	MSMS	20200724_QExHFX1_RSLC1_Uezuelmez_Breiteneder_ext_Uni_MFPL_rArah2_50p	543.281	2	543.28	1084.54	NaN	NaN	NaN	NaN	NaN	NaN	NaN	NaN	18.167	1	18.167	17.667	18.667	0								0	0	0	0.00066527	1	5070
NLPQQCGLR		9	Unmodified	_NLPQQCGLR_					0	0	0	0	0	rAra_h2	rAra_h2	rAra_h2	MSMS	20200724_QExHFX1_RSLC1_Uezuelmez_Breiteneder_ext_Uni_MFPL_rArah2_50p	543.28	2	543.28	1084.54	NaN	NaN	NaN	NaN	NaN	NaN	NaN	NaN	18.366	1	18.366	17.866	18.866	0								0	0	0	5.3438e-07	1	5151
NLPQQCGLR		9	Unmodified	_NLPQQCGLR_					0	0	0	0	0	rAra_h2	rAra_h2	rAra_h2	MSMS	20200724_QExHFX1_RSLC1_Uezuelmez_Breiteneder_ext_Uni_MFPL_rArah2_50p	543.28	2	543.28	1084.54	NaN	NaN	NaN	NaN	NaN	NaN	NaN	NaN	18.763	1	18.763	18.263	19.263	0								0	0	0	0.0017218	1	5298
NLPQQCGLR		9	Unmodified	_NLPQQCGLR_					0	0	0	0	0	rAra_h2	rAra_h2	rAra_h2	MSMS	20200724_QExHFX1_RSLC1_Uezuelmez_Breiteneder_ext_Uni_MFPL_rArah2_50p	543.279	2	543.28	1084.54	NaN	NaN	NaN	NaN	NaN	NaN	NaN	NaN	19.128	1	19.128	18.628	19.628	0								0	0	0	0.0012821	1	5430
NLPQQCGLR		9	Unmodified	_NLPQQCGLR_					0	0	0	0	0	rAra_h2	rAra_h2	rAra_h2	MSMS	20200724_QExHFX1_RSLC1_Uezuelmez_Breiteneder_ext_Uni_MFPL_rArah2_50p	543.28	2	543.28	1084.54	NaN	NaN	NaN	NaN	NaN	NaN	NaN	NaN	19.331	1	19.331	18.831	19.831	0								0	0	0	6.0444e-05	1	5500
NLPQQCGLR		9	Unmodified	_NLPQQCGLR_					0	0	0	0	0	rAra_h2	rAra_h2	rAra_h2	MSMS	20200724_QExHFX1_RSLC1_Uezuelmez_Breiteneder_ext_Uni_MFPL_rArah2_50p	543.279	2	543.28	1084.54	NaN	NaN	NaN	NaN	NaN	NaN	NaN	NaN	19.523	1	19.523	19.023	20.023	0								0	0	0	0.00019569	1	5564
NLPQQCGLR		9	Unmodified	_NLPQQCGLR_					0	0	0	0	0	rAra_h2	rAra_h2	rAra_h2	MSMS	20200724_QExHFX1_RSLC1_Uezuelmez_Breiteneder_ext_Uni_MFPL_rArah2_50p	543.28	2	543.28	1084.54	NaN	NaN	NaN	NaN	NaN	NaN	NaN	NaN	19.724	1	19.724	19.224	20.224	0								0	0	0	5.3422e-07	1	5627
NLPQQCGLR		9	Unmodified	_NLPQQCGLR_					0	0	0	0	0	rAra_h2	rAra_h2	rAra_h2	MSMS	20200724_QExHFX1_RSLC1_Uezuelmez_Breiteneder_ext_Uni_MFPL_rArah2_50p	543.28	2	543.28	1084.54	NaN	NaN	NaN	NaN	NaN	NaN	NaN	NaN	19.914	1	19.914	19.414	20.414	0								0	0	0	0.0010419	1	5695
NLPQQCGLR		9	Unmodified	_NLPQQCGLR_					0	0	0	0	0	rAra_h2	rAra_h2	rAra_h2	MSMS	20200724_QExHFX1_RSLC1_Uezuelmez_Breiteneder_ext_Uni_MFPL_rArah2_50p	543.279	2	543.28	1084.54	NaN	NaN	NaN	NaN	NaN	NaN	NaN	NaN	20.121	1	20.121	19.621	20.621	0								0	0	0	0.00079856	1	5765
NLPQQCGLR		9	Unmodified	_NLPQQCGLR_					0	0	0	0	0	rAra_h2	rAra_h2	rAra_h2	MSMS	20200724_QExHFX1_RSLC1_Uezuelmez_Breiteneder_ext_Uni_MFPL_rArah2_50p	543.28	2	543.28	1084.54	NaN	NaN	NaN	NaN	NaN	NaN	NaN	NaN	20.348	1	20.348	19.848	20.848	0								0	0	0	0.00025319	1	5840
NLPQQCGLR		9	Unmodified	_NLPQQCGLR_					0	0	0	0	0	rAra_h2	rAra_h2	rAra_h2	MSMS	20200724_QExHFX1_RSLC1_Uezuelmez_Breiteneder_ext_Uni_MFPL_rArah2_50p	543.28	2	543.28	1084.54	NaN	NaN	NaN	NaN	NaN	NaN	NaN	NaN	20.602	1	20.602	20.102	21.102	0								0	0	0	0.00066527	1	5933
NLPQQCGLR		9	Unmodified	_NLPQQCGLR_					0	0	0	0	0	rAra_h2	rAra_h2	rAra_h2	MSMS	20200724_QExHFX1_RSLC1_Uezuelmez_Breiteneder_ext_Uni_MFPL_rArah2_50p	543.28	2	543.28	1084.54	NaN	NaN	NaN	NaN	NaN	NaN	NaN	NaN	20.794	1	20.794	20.294	21.294	0								0	0	0	7.1912e-07	1	6001
NLPQQCGLR		9	Unmodified	_NLPQQCGLR_					0	0	0	0	0	rAra_h2	rAra_h2	rAra_h2	MSMS	20200724_QExHFX1_RSLC1_Uezuelmez_Breiteneder_ext_Uni_MFPL_rArah2_50p	543.28	2	543.28	1084.54	NaN	NaN	NaN	NaN	NaN	NaN	NaN	NaN	21	1	21	20.5	21.5	0								0	0	0	0.00070699	1	6074
NLPQQCGLR		9	Unmodified	_NLPQQCGLR_					0	0	0	0	0	rAra_h2	rAra_h2	rAra_h2	MSMS	20200724_QExHFX1_RSLC1_Uezuelmez_Breiteneder_ext_Uni_MFPL_rArah2_50p	543.28	2	543.28	1084.54	NaN	NaN	NaN	NaN	NaN	NaN	NaN	NaN	21.185	1	21.185	20.685	21.685	0								0	0	0	0.00014407	1	6130
NLPQQCGLR		9	Unmodified	_NLPQQCGLR_					0	0	0	0	0	rAra_h2	rAra_h2	rAra_h2	MSMS	20200724_QExHFX1_RSLC1_Uezuelmez_Breiteneder_ext_Uni_MFPL_rArah2_50p	543.28	2	543.28	1084.54	NaN	NaN	NaN	NaN	NaN	NaN	NaN	NaN	21.382	1	21.382	20.882	21.882	0								0	0	0	0.00077891	1	6189
NLPQQCGLR		9	Unmodified	_NLPQQCGLR_					0	0	0	0	0	rAra_h2	rAra_h2	rAra_h2	MSMS	20200724_QExHFX1_RSLC1_Uezuelmez_Breiteneder_ext_Uni_MFPL_rArah2_50p	543.28	2	543.28	1084.54	NaN	NaN	NaN	NaN	NaN	NaN	NaN	NaN	21.585	1	21.585	21.085	22.085	0								0	0	0	6.0444e-05	1	6248
NLPQQCGLR		9	Unmodified	_NLPQQCGLR_					0	0	0	0	0	rAra_h2	rAra_h2	rAra_h2	MSMS	20200724_QExHFX1_RSLC1_Uezuelmez_Breiteneder_ext_Uni_MFPL_rArah2_50p	543.28	2	543.28	1084.54	NaN	NaN	NaN	NaN	NaN	NaN	NaN	NaN	21.797	1	21.797	21.297	22.297	0								0	0	0	5.3438e-07	1	6306
NLPQQCGLR		9	Unmodified	_NLPQQCGLR_					0	0	0	0	0	rAra_h2	rAra_h2	rAra_h2	MSMS	20200724_QExHFX1_RSLC1_Uezuelmez_Breiteneder_ext_Uni_MFPL_rArah2_50p	543.28	2	543.28	1084.54	NaN	NaN	NaN	NaN	NaN	NaN	NaN	NaN	21.986	1	21.986	21.486	22.486	0								0	0	0	0.00098555	1	6358
NLPQQCGLR		9	Unmodified	_NLPQQCGLR_					0	0	0	0	0	rAra_h2	rAra_h2	rAra_h2	MSMS	20200724_QExHFX1_RSLC1_Uezuelmez_Breiteneder_ext_Uni_MFPL_rArah2_50p	543.28	2	543.28	1084.54	NaN	NaN	NaN	NaN	NaN	NaN	NaN	NaN	22.178	1	22.178	21.678	22.678	0								0	0	0	0.00055167	1	6409
NLPQQCGLR		9	Unmodified	_NLPQQCGLR_					0	0	0	0	0	rAra_h2	rAra_h2	rAra_h2	MSMS	20200724_QExHFX1_RSLC1_Uezuelmez_Breiteneder_ext_Uni_MFPL_rArah2_50p	543.28	2	543.28	1084.54	NaN	NaN	NaN	NaN	NaN	NaN	NaN	NaN	22.392	1	22.392	21.892	22.892	0								0	0	0	7.1702e-07	1	6466
NLPQQCGLR		9	Unmodified	_NLPQQCGLR_					0	0	0	0	0	rAra_h2	rAra_h2	rAra_h2	MSMS	20200724_QExHFX1_RSLC1_Uezuelmez_Breiteneder_ext_Uni_MFPL_rArah2_50p	543.281	2	543.28	1084.54	NaN	NaN	NaN	NaN	NaN	NaN	NaN	NaN	22.659	1	22.659	22.159	23.159	0								0	0	0	1.497e-05	1	6538
NLPQQCGLR		9	Unmodified	_NLPQQCGLR_					0	0	0	0	0	rAra_h2	rAra_h2	rAra_h2	MSMS	20200724_QExHFX1_RSLC1_Uezuelmez_Breiteneder_ext_Uni_MFPL_rArah2_50p	543.28	2	543.28	1084.54	NaN	NaN	NaN	NaN	NaN	NaN	NaN	NaN	22.863	1	22.863	22.363	23.363	0								0	0	0	0.00014381	1	6592
NLPQQCGLR		9	Unmodified	_NLPQQCGLR_					0	0	0	0	0	rAra_h2	rAra_h2	rAra_h2	MSMS	20200724_QExHFX1_RSLC1_Uezuelmez_Breiteneder_ext_Uni_MFPL_rArah2_50p	543.279	2	543.28	1084.54	NaN	NaN	NaN	NaN	NaN	NaN	NaN	NaN	23.056	1	23.056	22.556	23.556	0								0	0	0	0.0014715	1	6644
NLPQQCGLR		9	Unmodified	_NLPQQCGLR_					0	0	0	0	0	rAra_h2	rAra_h2	rAra_h2	MSMS	20200724_QExHFX1_RSLC1_Uezuelmez_Breiteneder_ext_Uni_MFPL_rArah2_50p	543.28	2	543.28	1084.54	NaN	NaN	NaN	NaN	NaN	NaN	NaN	NaN	23.265	1	23.265	22.765	23.765	0								0	0	0	0.0011534	1	6702
NLPQQCGLR		9	Unmodified	_NLPQQCGLR_					0	0	0	0	0	rAra_h2	rAra_h2	rAra_h2	MSMS	20200724_QExHFX1_RSLC1_Uezuelmez_Breiteneder_ext_Uni_MFPL_rArah2_50p	543.28	2	543.28	1084.54	NaN	NaN	NaN	NaN	NaN	NaN	NaN	NaN	23.454	1	23.454	22.954	23.954	0								0	0	0	0.00067877	1	6752
NLPQQCGLR		9	Unmodified	_NLPQQCGLR_					0	0	0	0	0	rAra_h2	rAra_h2	rAra_h2	MSMS	20200724_QExHFX1_RSLC1_Uezuelmez_Breiteneder_ext_Uni_MFPL_rArah2_50p	543.281	2	543.28	1084.54	NaN	NaN	NaN	NaN	NaN	NaN	NaN	NaN	23.639	1	23.639	23.139	24.139	0								0	0	0	0.00071974	1	6799
NLPQQCGLR		9	Unmodified	_NLPQQCGLR_					0	0	0	0	0	rAra_h2	rAra_h2	rAra_h2	MSMS	20200724_QExHFX1_RSLC1_Uezuelmez_Breiteneder_ext_Uni_MFPL_rArah2_50p	543.282	2	543.28	1084.54	NaN	NaN	NaN	NaN	NaN	NaN	NaN	NaN	23.85	1	23.85	23.35	24.35	0								0	0	0	0.00077891	1	6856
NLPQQCGLR		9	Unmodified	_NLPQQCGLR_					0	0	0	0	0	rAra_h2	rAra_h2	rAra_h2	MSMS	20200724_QExHFX1_RSLC1_Uezuelmez_Breiteneder_ext_Uni_MFPL_rArah2_50p	543.282	2	543.28	1084.54	NaN	NaN	NaN	NaN	NaN	NaN	NaN	NaN	24.036	1	24.036	23.536	24.536	0								0	0	0	0.00071974	1	6907
NLPQQCGLR		9	Unmodified	_NLPQQCGLR_					0	0	0	0	0	rAra_h2	rAra_h2	rAra_h2	MSMS	20200724_QExHFX1_RSLC1_Uezuelmez_Breiteneder_ext_Uni_MFPL_rArah2_50p	543.282	2	543.28	1084.54	NaN	NaN	NaN	NaN	NaN	NaN	NaN	NaN	24.28	1	24.28	23.78	24.78	0								0	0	0	0.00014381	1	6972
NLPQQCGLR		9	Unmodified	_NLPQQCGLR_					0	0	0	0	0	rAra_h2	rAra_h2	rAra_h2	MSMS	20200724_QExHFX1_RSLC1_Uezuelmez_Breiteneder_ext_Uni_MFPL_rArah2_50p	543.281	2	543.28	1084.54	NaN	NaN	NaN	NaN	NaN	NaN	NaN	NaN	24.843	1	24.843	24.343	25.343	0								0	0	0	7.1272e-07	1	7134
NLPQQCGLR		9	Unmodified	_NLPQQCGLR_					0	0	0	0	0	rAra_h2	rAra_h2	rAra_h2	MSMS	20200724_QExHFX1_RSLC1_Uezuelmez_Breiteneder_ext_Uni_MFPL_rArah2_50p	543.281	2	543.28	1084.54	NaN	NaN	NaN	NaN	NaN	NaN	NaN	NaN	25.185	1	25.185	24.685	25.685	0								0	0	0	0.0032081	1	7232
NLPQQCGLR		9	Unmodified	_NLPQQCGLR_					0	0	0	0	0	rAra_h2	rAra_h2	rAra_h2	MSMS	20200724_QExHFX1_RSLC1_Uezuelmez_Breiteneder_ext_Uni_MFPL_rArah2_50p	543.279	2	543.28	1084.54	NaN	NaN	NaN	NaN	NaN	NaN	NaN	NaN	25.371	1	25.371	24.871	25.871	0								0	0	0	0.00077891	1	7285
NLPQQCGLR		9	Unmodified	_NLPQQCGLR_					0	0	0	0	0	rAra_h2	rAra_h2	rAra_h2	MSMS	20200724_QExHFX1_RSLC1_Uezuelmez_Breiteneder_ext_Uni_MFPL_rArah2_50p	543.28	2	543.28	1084.54	NaN	NaN	NaN	NaN	NaN	NaN	NaN	NaN	25.739	1	25.739	25.239	26.239	0								0	0	0	0.00070699	1	7395
NLPQQCGLR		9	Unmodified	_NLPQQCGLR_					0	0	0	0	0	rAra_h2	rAra_h2	rAra_h2	MSMS	20200724_QExHFX1_RSLC1_Uezuelmez_Breiteneder_ext_Uni_MFPL_rArah2_50p	543.28	2	543.28	1084.54	NaN	NaN	NaN	NaN	NaN	NaN	NaN	NaN	25.96	1	25.96	25.46	26.46	0								0	0	0	0.0011534	1	7456
NLPQQCGLR		9	Unmodified	_NLPQQCGLR_					0	0	0	0	0	rAra_h2	rAra_h2	rAra_h2	MSMS	20200724_QExHFX1_RSLC1_Uezuelmez_Breiteneder_ext_Uni_MFPL_rArah2_50p	543.28	2	543.28	1084.54	NaN	NaN	NaN	NaN	NaN	NaN	NaN	NaN	26.179	1	26.179	25.679	26.679	0								0	0	0	0.00077891	1	7511
NLPQQCGLR		9	Unmodified	_NLPQQCGLR_					0	0	0	0	0	rAra_h2	rAra_h2	rAra_h2	MSMS	20200724_QExHFX1_RSLC1_Uezuelmez_Breiteneder_ext_Uni_MFPL_rArah2_50p	543.28	2	543.28	1084.54	NaN	NaN	NaN	NaN	NaN	NaN	NaN	NaN	26.389	1	26.389	25.889	26.889	0								0	0	0	0.00077891	1	7562
NLPQQCGLR		9	Unmodified	_NLPQQCGLR_					0	0	0	0	0	rAra_h2	rAra_h2	rAra_h2	MSMS	20200724_QExHFX1_RSLC1_Uezuelmez_Breiteneder_ext_Uni_MFPL_rArah2_50p	543.28	2	543.28	1084.54	NaN	NaN	NaN	NaN	NaN	NaN	NaN	NaN	26.615	1	26.615	26.115	27.115	0								0	0	0	0.00066527	1	7620
NLPQQCGLR		9	Unmodified	_NLPQQCGLR_					0	0	0	0	0	rAra_h2	rAra_h2	rAra_h2	MSMS	20200724_QExHFX1_RSLC1_Uezuelmez_Breiteneder_ext_Uni_MFPL_rArah2_50p	543.279	2	543.28	1084.54	NaN	NaN	NaN	NaN	NaN	NaN	NaN	NaN	26.837	1	26.837	26.337	27.337	0								0	0	0	0.00066527	1	7681
NLPQQCGLR		9	Unmodified	_NLPQQCGLR_					0	0	0	0	0	rAra_h2	rAra_h2	rAra_h2	MSMS	20200724_QExHFX1_RSLC1_Uezuelmez_Breiteneder_ext_Uni_MFPL_rArah2_50p	543.28	2	543.28	1084.54	NaN	NaN	NaN	NaN	NaN	NaN	NaN	NaN	27.035	1	27.035	26.535	27.535	0								0	0	0	0.00039059	1	7732
NLPQQCGLR		9	Unmodified	_NLPQQCGLR_					0	0	0	0	0	rAra_h2	rAra_h2	rAra_h2	MSMS	20200724_QExHFX1_RSLC1_Uezuelmez_Breiteneder_ext_Uni_MFPL_rArah2_50p	543.28	2	543.28	1084.54	NaN	NaN	NaN	NaN	NaN	NaN	NaN	NaN	27.235	1	27.235	26.735	27.735	0								0	0	0	0.0011534	1	7790
NLPQQCGLR		9	Unmodified	_NLPQQCGLR_					0	0	0	0	0	rAra_h2	rAra_h2	rAra_h2	MSMS	20200724_QExHFX1_RSLC1_Uezuelmez_Breiteneder_ext_Uni_MFPL_rArah2_50p	543.279	2	543.28	1084.54	NaN	NaN	NaN	NaN	NaN	NaN	NaN	NaN	27.436	1	27.436	26.936	27.936	0								0	0	0	0.00070699	1	7845
NLPQQCGLR		9	Unmodified	_NLPQQCGLR_					0	0	0	0	0	rAra_h2	rAra_h2	rAra_h2	MSMS	20200724_QExHFX1_RSLC1_Uezuelmez_Breiteneder_ext_Uni_MFPL_rArah2_50p	543.279	2	543.28	1084.54	NaN	NaN	NaN	NaN	NaN	NaN	NaN	NaN	27.637	1	27.637	27.137	28.137	0								0	0	0	0.00055167	1	7907
NLPQQCGLR		9	Unmodified	_NLPQQCGLR_					0	0	0	0	0	rAra_h2	rAra_h2	rAra_h2	MSMS	20200724_QExHFX1_RSLC1_Uezuelmez_Breiteneder_ext_Uni_MFPL_rArah2_50p	543.28	2	543.28	1084.54	NaN	NaN	NaN	NaN	NaN	NaN	NaN	NaN	27.823	1	27.823	27.323	28.323	0								0	0	0	0.00054465	1	7957
NLPQQCGLR		9	Unmodified	_NLPQQCGLR_					0	0	0	0	0	rAra_h2	rAra_h2	rAra_h2	MSMS	20200724_QExHFX1_RSLC1_Uezuelmez_Breiteneder_ext_Uni_MFPL_rArah2_50p	543.279	2	543.28	1084.54	NaN	NaN	NaN	NaN	NaN	NaN	NaN	NaN	28.27	1	28.27	27.77	28.77	0								0	0	0	0.002844	1	8078
NLPQQCGLR		9	Unmodified	_NLPQQCGLR_					0	0	0	0	0	rAra_h2	rAra_h2	rAra_h2	MSMS	20200724_QExHFX1_RSLC1_Uezuelmez_Breiteneder_ext_Uni_MFPL_rArah2_50p	543.279	2	543.28	1084.54	NaN	NaN	NaN	NaN	NaN	NaN	NaN	NaN	28.475	1	28.475	27.975	28.975	0								0	0	0	0.0014394	1	8141
NLPQQCGLR		9	Unmodified	_NLPQQCGLR_					0	0	0	0	0	rAra_h2	rAra_h2	rAra_h2	MSMS	20200724_QExHFX1_RSLC1_Uezuelmez_Breiteneder_ext_Uni_MFPL_rArah2_50p	543.279	2	543.28	1084.54	NaN	NaN	NaN	NaN	NaN	NaN	NaN	NaN	28.659	1	28.659	28.159	29.159	0								0	0	0	0.00055167	1	8191
NLPQQCGLR		9	Unmodified	_NLPQQCGLR_					0	0	0	0	0	rAra_h2	rAra_h2	rAra_h2	MSMS	20200724_QExHFX1_RSLC1_Uezuelmez_Breiteneder_ext_Uni_MFPL_rArah2_50p	543.28	2	543.28	1084.54	NaN	NaN	NaN	NaN	NaN	NaN	NaN	NaN	28.838	1	28.838	28.338	29.338	0								0	0	0	0.0011534	1	8238
NLPQQCGLR		9	Unmodified	_NLPQQCGLR_					0	0	0	0	0	rAra_h2	rAra_h2	rAra_h2	MSMS	20200724_QExHFX1_RSLC1_Uezuelmez_Breiteneder_ext_Uni_MFPL_rArah2_50p	543.279	2	543.28	1084.54	NaN	NaN	NaN	NaN	NaN	NaN	NaN	NaN	29.037	1	29.037	28.537	29.537	0								0	0	0	0.0014715	1	8291
NLPQQCGLR		9	Unmodified	_NLPQQCGLR_					0	0	0	0	0	rAra_h2	rAra_h2	rAra_h2	MSMS	20200724_QExHFX1_RSLC1_Uezuelmez_Breiteneder_ext_Uni_MFPL_rArah2_50p	543.279	2	543.28	1084.54	NaN	NaN	NaN	NaN	NaN	NaN	NaN	NaN	29.238	1	29.238	28.738	29.738	0								0	0	0	0.0012589	1	8345
NLPQQCGLR		9	Unmodified	_NLPQQCGLR_					0	0	0	0	0	rAra_h2	rAra_h2	rAra_h2	MULTI-SECPEP	20200724_QExHFX1_RSLC1_Uezuelmez_Breiteneder_ext_Uni_MFPL_rArah2_50p	1085.03	1	1085.55	1084.54	29584.5	-1.3747	-0.0014923	0.071639	7.7768e-05	-1.3031	-0.0014146	1085.55	15.457	0.86697	15.457	15.24	16.107	1.7764e-15					107	36	4	0	0	0	0.00010844	1	4120
NLPQQCGLRAPQR		13	Unmodified	_NLPQQCGLRAPQR_					0	0	0	0	1	rAra_h2	rAra_h2	rAra_h2	MULTI-MSMS	20200724_QExHFX1_RSLC1_Uezuelmez_Breiteneder_ext_Uni_MFPL_rArah2_50p	513.607	3	513.272	1536.79	44511.7	0.17035	8.7434e-05	0.29578	0.00015181	0.46612	0.00023925	513.272	14.995	0.47905	14.995	14.787	15.266	0					48	16	4	0	0	0	0.00021341	1	3913
PCEQHLMQK		9	Oxidation (M)	_PCEQHLM(ox)QK_	PCEQHLM(1)QK		PCEQHLM(115.7)QK		0	0	1	0	0	rAra_h2	rAra_h2	rAra_h2	MULTI-MSMS	20200724_QExHFX1_RSLC1_Uezuelmez_Breiteneder_ext_Uni_MFPL_rArah2_50p	593.77	2	593.771	1185.53	40547.8	0.29304	0.000174	-0.65809	-0.00039075	-0.36504	-0.00021675	593.771	9.0249	0.57966	9.0249	8.8815	9.4611	0					59	25	4	0	0	0	9.1656e-05	2	2211
PCEQHLMQK		9	Oxidation (M)	_PCEQHLM(ox)QK_	PCEQHLM(1)QK		PCEQHLM(76.94)QK		0	0	1	0	0	rAra_h2	rAra_h2	rAra_h2	MULTI-MSMS	20200724_QExHFX1_RSLC1_Uezuelmez_Breiteneder_ext_Uni_MFPL_rArah2_50p	396.183	3	396.183	1185.53	50241.2	-0.092013	-3.6454e-05	-0.26994	-0.00010695	-0.36195	-0.0001434	396.183	9.0212	0.45002	9.0212	8.8815	9.3315	0					40	20	4	0	0	0	0.0033609	1	2217
PCEQHLMQK		9	Unmodified	_PCEQHLMQK_					0	0	0	0	0	rAra_h2	rAra_h2	rAra_h2	MULTI-MSMS	20200724_QExHFX1_RSLC1_Uezuelmez_Breiteneder_ext_Uni_MFPL_rArah2_50p	585.773	2	585.773	1169.53	44466.3	0.4157	0.00024351	-1.6576	-0.00097096	-1.2419	-0.00072746	585.772	11.348	0.31609	11.348	11.226	11.542	0					15	8	3	0	0	0	5.0983e-06	1	2802
QQEQQFK		7	Unmodified	_QQEQQFK_					0	0	0	0	0	rAra_h2	rAra_h2	rAra_h2	MULTI-MSMS	20200724_QExHFX1_RSLC1_Uezuelmez_Breiteneder_ext_Uni_MFPL_rArah2_50p	468.233	2	468.233	934.451	52946.6	-0.027737	-1.2987e-05	0.27153	0.00012714	0.2438	0.00011415	468.233	10.686	0.21033	10.686	10.565	10.775	0					8	5	2	0	0	0	0.0015202	1	2640
QQEQQFK		7	Gln->pyro-Glu	_(gl)QQEQQFK_					0	1	0	0	0	rAra_h2	rAra_h2	rAra_h2	MULTI-MSMS	20200724_QExHFX1_RSLC1_Uezuelmez_Breiteneder_ext_Uni_MFPL_rArah2_50p	459.719	2	459.719	917.424	45786.1	0.15904	7.3114e-05	-0.25482	-0.00011715	-0.095779	-4.4032e-05	459.719	16.219	1.4691	16.219	16.007	17.476	0					154	57	5	0	0	0	1.4249e-12	4	4402
QQEQQFKR		8	Unmodified	_QQEQQFKR_					0	0	0	0	1	rAra_h2	rAra_h2	rAra_h2	MULTI-MSMS	20200724_QExHFX1_RSLC1_Uezuelmez_Breiteneder_ext_Uni_MFPL_rArah2_50p	546.283	2	546.283	1090.55	42160.4	-0.15662	-8.5561e-05	0.18301	9.9976e-05	0.026387	1.4415e-05	546.283	9.581	1.1913	9.581	9.4064	10.598	0					103	33	6	0	0	0	2.6191e-08	5	2428
QQEQQFKR		8	Gln->pyro-Glu	_(gl)QQEQQFKR_					0	1	0	0	1	rAra_h2	rAra_h2	rAra_h2	MULTI-MSMS	20200724_QExHFX1_RSLC1_Uezuelmez_Breiteneder_ext_Uni_MFPL_rArah2_50p	537.77	2	537.77	1073.53	41540.7	-0.3566	-0.00019177	0.18719	0.00010067	-0.1694	-9.1101e-05	537.77	13.01	1.3047	13.01	12.654	13.959	0					144	46	6	0	0	0	7.6002e-09	5	3270
QQEQQFKRELR		11	Unmodified	_QQEQQFKRELR_					0	0	0	0	2	rAra_h2	rAra_h2	rAra_h2	MULTI-MSMS	20200724_QExHFX1_RSLC1_Uezuelmez_Breiteneder_ext_Uni_MFPL_rArah2_50p	497.268	3	497.267	1488.78	45916.3	-0.097947	-4.8706e-05	-0.37454	-0.00018625	-0.47249	-0.00023495	497.601	12.066	0.26719	12.066	11.94	12.207	1.7764e-15					21	8	4	0	0	0	0.00031893	1	3031
QQWELQGDR		9	Unmodified	_QQWELQGDR_					0	0	0	0	0	rAra_h2	rAra_h2	rAra_h2	MULTI-MSMS	20200724_QExHFX1_RSLC1_Uezuelmez_Breiteneder_ext_Uni_MFPL_rArah2_50p	580.279	2	580.278	1158.54	41144.3	0.29875	0.00017336	0.072164	4.1875e-05	0.37091	0.00021523	580.278	19.329	0.33554	19.329	19.165	19.5	0					45	12	4	0	0	0	3.8619e-06	2	5471
QQWELQGDR		9	Gln->pyro-Glu	_(gl)QQWELQGDR_					0	1	0	0	0	rAra_h2	rAra_h2	rAra_h2	MULTI-MSMS	20200724_QExHFX1_RSLC1_Uezuelmez_Breiteneder_ext_Uni_MFPL_rArah2_50p	571.765	2	571.765	1141.52	41714.5	-0.29302	-0.00016754	0.43607	0.00024933	0.14305	8.1791e-05	571.765	26.638	0.51636	26.638	26.468	26.984	0					39	14	4	0	0	0	5.7044e-06	2	7662
QQWELQGDRR		10	Unmodified	_QQWELQGDRR_					0	0	0	0	1	rAra_h2	rAra_h2	rAra_h2	MULTI-MSMS	20200724_QExHFX1_RSLC1_Uezuelmez_Breiteneder_ext_Uni_MFPL_rArah2_50p	439.222	3	439.222	1314.64	46819.7	-0.21489	-9.4386e-05	0.35213	0.00015466	0.13724	6.0278e-05	439.222	15.984	0.84989	15.984	15.794	16.644	0					113	34	4	0	0	0	6.5608e-08	4	4255
QQWELQGDRR		10	Unmodified	_QQWELQGDRR_					0	0	0	0	1	rAra_h2	rAra_h2	rAra_h2	MULTI-MSMS	20200724_QExHFX1_RSLC1_Uezuelmez_Breiteneder_ext_Uni_MFPL_rArah2_50p	658.329	2	658.329	1314.64	38120.6	-0.19282	-0.00012694	0.042065	2.7692e-05	-0.15076	-9.9248e-05	658.329	15.984	0.66173	15.984	15.818	16.479	0					103	27	4	0	0	0	3.7868e-22	3	4403
RCQSQLER		8	Unmodified	_RCQSQLER_					0	0	0	0	1	rAra_h2	rAra_h2	rAra_h2	MULTI-MSMS	20200724_QExHFX1_RSLC1_Uezuelmez_Breiteneder_ext_Uni_MFPL_rArah2_50p	538.767	2	538.767	1075.52	41244.5	-0.027979	-1.5074e-05	-0.51214	-0.00027592	-0.54012	-0.000291	538.767	9.1436	0.65414	9.1436	8.9822	9.6364	1.7764e-15					90	27	5	0	0	0	0.0014581	1	2235
RDPYSPSPYDR		11	Oxidation (P)	_RDPYSP(ox)SPYDR_		RDP(0.001)YSP(0.997)SP(0.002)YDR		RDP(-31.81)YSP(27.03)SP(-27.03)YDR	0	0	0	1	1	rAra_h2	rAra_h2	rAra_h2	MULTI-MSMS	20200724_QExHFX1_RSLC1_Uezuelmez_Breiteneder_ext_Uni_MFPL_rArah2_50p	684.813	2	684.813	1367.61	37094	-0.44657	-0.00030582	0.2743	0.00018784	-0.17227	-0.00011798	684.813	13.343	0.93795	13.343	12.622	13.56	-1.7764e-15					88	31	6	0	0	0	6.0495e-07	2	3412
RDPYSPSPYDR		11	Oxidation (P)	_RDPYSP(ox)SPYDR_		RDP(0.008)YSP(0.985)SP(0.007)YDR		RDP(-20.83)YSP(20.83)SP(-21.79)YDR	0	0	0	1	1	rAra_h2	rAra_h2	rAra_h2	MSMS	20200724_QExHFX1_RSLC1_Uezuelmez_Breiteneder_ext_Uni_MFPL_rArah2_50p	456.876	3	456.877	1367.61	NaN	NaN	NaN	NaN	NaN	NaN	NaN	NaN	13.19	1	13.19	12.69	13.69	0								0	0	0	0.0033849	1	3363
RDPYSPSPYDR		11	Unmodified	_RDPYSPSPYDR_					0	0	0	0	1	rAra_h2	rAra_h2	rAra_h2	MULTI-MSMS	20200724_QExHFX1_RSLC1_Uezuelmez_Breiteneder_ext_Uni_MFPL_rArah2_50p	676.815	2	676.815	1351.62	37790.5	-0.77282	-0.00052306	-0.19211	-0.00013003	-0.96493	-0.00065308	676.815	15.358	3.0557	15.358	14.873	17.929	0					368	119	6	0	0	0	9.7508e-07	2	3921
RDPYSPSPYDR		11	Unmodified	_RDPYSPSPYDR_					0	0	0	0	1	rAra_h2	rAra_h2	rAra_h2	MULTI-MSMS	20200724_QExHFX1_RSLC1_Uezuelmez_Breiteneder_ext_Uni_MFPL_rArah2_50p	451.546	3	451.546	1351.62	46097.4	-0.74826	-0.00033788	0.16245	7.3353e-05	-0.58581	-0.00026452	451.546	15.362	3.0974	15.362	14.873	17.971	1.7764e-15					390	121	6	0	0	0	9.819e-05	2	3928
RDPYSPSPYDRR		12	Oxidation (P)	_RDPYSP(ox)SPYDRR_		RDPYSP(1)SPYDRR		RDP(-94.79)YSP(52.21)SP(-52.21)YDRR	0	0	0	1	2	rAra_h2	rAra_h2	rAra_h2	MULTI-MSMS	20200724_QExHFX1_RSLC1_Uezuelmez_Breiteneder_ext_Uni_MFPL_rArah2_50p	508.911	3	508.911	1523.71	44010.4	0.15183	7.7269e-05	-0.10984	-5.5897e-05	0.041995	2.1372e-05	508.911	11.787	1.3822	11.787	11.402	12.784	0					156	52	4	0	0	0	2.8248e-16	5	3025
RDPYSPSPYDRR		12	Oxidation (P)	_RDPYSP(ox)SPYDRR_		RDP(0.043)YSP(0.781)SP(0.175)YDRR		RDP(-12.57)YSP(6.49)SP(-6.49)YDRR	0	0	0	1	2	rAra_h2	rAra_h2	rAra_h2	MULTI-MSMS	20200724_QExHFX1_RSLC1_Uezuelmez_Breiteneder_ext_Uni_MFPL_rArah2_50p	763.366	2	762.863	1523.71	36543.2	-0.24154	-0.00018426	0.30316	0.00023127	0.061615	4.7004e-05	762.863	11.815	0.97995	11.815	11.608	12.588	0					94	40	3	0	0	0	9.1551e-05	4	2968
RDPYSPSPYDRR		12	Unmodified	_RDPYSPSPYDRR_					0	0	0	0	2	rAra_h2	rAra_h2	rAra_h2	MULTI-MSMS	20200724_QExHFX1_RSLC1_Uezuelmez_Breiteneder_ext_Uni_MFPL_rArah2_50p	503.579	3	503.58	1507.72	44043.8	-0.1627	-8.1934e-05	-0.029822	-1.5018e-05	-0.19253	-9.6952e-05	503.58	13.085	1.8093	13.085	12.719	14.529	-1.7764e-15					208	63	7	0	0	0	2.2398e-11	4	3350
RDPYSPSPYDRR		12	Unmodified	_RDPYSPSPYDRR_					0	0	0	0	2	rAra_h2	rAra_h2	rAra_h2	MULTI-MSMS	20200724_QExHFX1_RSLC1_Uezuelmez_Breiteneder_ext_Uni_MFPL_rArah2_50p	754.865	2	754.866	1507.72	36330.6	-0.4248	-0.00032067	0.033454	2.5254e-05	-0.39135	-0.00029542	754.866	13.089	0.87925	13.089	12.75	13.629	0					111	30	6	0	0	0	0.00014773	3	3291
RDPYSPSPYDRR		12	Unmodified	_RDPYSPSPYDRR_					0	0	0	0	2	rAra_h2	rAra_h2	rAra_h2	MULTI-MSMS	20200724_QExHFX1_RSLC1_Uezuelmez_Breiteneder_ext_Uni_MFPL_rArah2_50p	378.187	4	377.936	1507.72	51385.3	-0.38643	-0.00014604	0.016051	6.0662e-06	-0.37038	-0.00013998	377.937	13.073	0.49569	13.073	12.946	13.442	0					47	17	4	0	0	0	2.8645e-07	1	3324
RQQWELQGDRR		11	Unmodified	_RQQWELQGDRR_					0	0	0	0	2	rAra_h2	rAra_h2	rAra_h2	MULTI-MSMS	20200724_QExHFX1_RSLC1_Uezuelmez_Breiteneder_ext_Uni_MFPL_rArah2_50p	491.255	3	491.255	1470.74	45562.1	-0.50516	-0.00024816	0.55932	0.00027477	0.05416	2.6606e-05	491.256	13.745	0.78564	13.745	13.584	14.369	0					69	28	4	0	0	0	2.2184e-22	2	3518
RQQWELQGDRR		11	Unmodified	_RQQWELQGDRR_					0	0	0	0	2	rAra_h2	rAra_h2	rAra_h2	MULTI-MSMS	20200724_QExHFX1_RSLC1_Uezuelmez_Breiteneder_ext_Uni_MFPL_rArah2_50p	736.379	2	736.379	1470.74	38016.5	-0.47969	-0.00035323	0.061269	4.5117e-05	-0.41842	-0.00030811	736.379	13.749	0.45791	13.749	13.605	14.063	0					35	17	3	0	0	0	0.00046255	1	3531
[truncated: 15 more columns]

## Sheet: Info
Operator: Natascha Hartl, Dorothea Anrather
Raw file
20200724_QExHFX1_RSLC1_Uezuelmez_Breiteneder_ext_Uni_MFPL_rArah2_50p.raw
Data processing:
DB search: MaxQuant 1.6.0.16, sequences of rAra_h2 + benthamiana DB + contaminant DB. Search parameters: standard,tryptic specificity, with oxidation(M, P), N-term acetylation as variable, and carbamidomethylation (C) as fixed modification, all data filtered at 1% PSM+protein+site FDR. Data were re-searched against rAra H2 sequence and contaminants only given the low MSMS counts of benthamiana pr…
Neither OpenSearch in FragPipe or error tolerant search with Mascot did reveal any additional biological modification
